# Supplementary material for: Design and synthesis of regioisomeric triazole based peptidomimetic macrocycles and their dipole moment controlled self-assembly
Source: Royal Society of Chemistry journal article supplement (doi:10.1039/c2cc36566a), 2012-01-01
Supplement: c2cc36566a.pdf [file c2cc36566a.pdf]

## Design and Synthesis of Regioisomeric Triazole/Amide Peptidomimetic Macrocycles and Their Dipole Moment Controlled Self-Assembly

Abhijit Ghorai,<sup>a</sup> E.Padmanaban,<sup>a</sup> Chaitali Mukhopadhyay,<sup>b</sup> Basudeb Achari,<sup>a</sup>  
Partha Chattopadhyay\*<sup>a</sup>

1. General Experimental Information
2. Synthetic Scheme for compounds **2a** and **2b**.
3. Preparation and Characterization of compounds **2a** and **2b**.
4. Structural determination of Compounds **2a** and **2b** by Multidimensional NMR Studies.
5. General information for Molecular Modelling Studies.
6. TEM and AFM imaging for compounds **2a** and **2b**.
7. <sup>1</sup>H, <sup>13</sup>C NMR data of **2a** .
8. IR spectra of compounds **2a** and **2b**.
9. <sup>1</sup>H, <sup>13</sup>C NMR spectra of **2a**.
10. <sup>1</sup>H-<sup>1</sup>H DQF-COSY spectrum of **2a** in (CD<sub>3</sub>CN+2%H<sub>2</sub>O) at 298K
11. <sup>1</sup>H-<sup>1</sup>H ROESY spectra of **2a** in (CD<sub>3</sub>CN+2%H<sub>2</sub>O) at 298K
12. Selected region of <sup>1</sup>H-<sup>1</sup>H ROESY spectrum of **2a** in (CD<sub>3</sub>CN+2%H<sub>2</sub>O)
13. <sup>1</sup>H, <sup>13</sup>C NMR spectra of **2b**.
14. Selected region for concentration dependent <sup>1</sup>H spectrum of **2b** at 243K in (2:3) CDCl<sub>3</sub>:CCl<sub>4</sub>.
15. <sup>1</sup>H-<sup>1</sup>H DQF-COSY spectrum of **2b** in CDCl<sub>3</sub> at 298K.
16. <sup>1</sup>H-<sup>1</sup>H ROESY spectrum of **2b** in CDCl<sub>3</sub> at 298K.
17. <sup>1</sup>H-<sup>1</sup>H ROESY spectrum of **2b** in (2:3) CDCl<sub>3</sub>:CCl<sub>4</sub> at 298K.
18. Schematic view of self-Assembly of compounds **2a** and **2b** by molecular modeling studies.
19. Coordinates of energy minimized structure of compounds **2a** and **2b** derived by modeling studies.

## GENERAL EXPERIMENTAL INFORMATION

Solvents were dried over standard drying agents and freshly distilled prior to use. Melting points were determined in open capillaries and were not corrected. Optical rotations were measured in  $\text{CHCl}_3$  solutions at room temperature using a cell of 1 dm length and  $\lambda = 589$  nm. IR spectra between 400 and 4000  $\text{cm}^{-1}$  were recorded with an FT-IR spectrometer as KBr pellets. Mass spectra were obtained under high resolution (HRMS).  $^1\text{H}$  and  $^{13}\text{C}$  NMR spectra were recorded in deuterated solvents on Bruker Avance-600 MHz.  $^1\text{H}$  NMR multiplicity patterns are designated as singlet (s), doublet (d), triplet (t), quartet (q); all first order splitting patterns are assigned. Splitting patterns that could not be interpreted or easily visualized are designated as multiplet (m) or broad (br). Column chromatographic separations were carried out on silica gel (60–120 mesh) and the cyclic peptides **2a** and **2b** were purified by preparative HPLC on Inertsil ODS-3-V, 250×4.6 mm, 5  $\mu\text{m}$  (C-18/AR/25) with Acetonitrile:water (45:55) as mobile phase. 1-Hydroxybenzotriazole (HOBt) and 1-[3-(dimethylamino)propyl]-3-ethyl-carbodiimide hydrochloride (EDCI) were purchased from Spectrochem. All other reagents and solvents were purchased from Aldrich or Merck.

## TEM Imaging

TEM studies were performed with a JEOL-JEM 2010 electron microscope operating at 200 kV and equipped with a double tilt holder ( $\pm 45^\circ$ ). Samples for electron microscopy were prepared by putting a drop of the nanotube suspension of **2a** in (4:1)  $\text{CH}_3\text{CN}:\text{H}_2\text{O}$  and **2b** in (2:3)  $\text{CDCl}_3:\text{CCl}_4$  on two different Cu/carbon coated grids, drying overnight and negative staining with uranyl acetate.

The selected area electron diffraction experiment was performed with the TEM operating in diffraction mode with the smallest selector aperture insertion which implies microcrystallinity of the self-assembled structures.

## AFM Sample Preparation and Imaging

Aliquots (10  $\mu\text{L}$ ) of the samples **2a** and **2b** were deposited onto freshly cleaved muscovite Ruby mica sheet (ASTM V1 Grade Ruby Mica from MICAFAFAB) for 15-30 minutes. Mica sheets are basically negatively charged so nano materials bind strongly on the mica surface. After 15 min the sample was dried using vacuum dryer. Sometimes the sample was gently washed with 0.5 ml Milli-Q water to remove the molecules that were not firmly attached to the mica and the sample dried as mentioned above.

AAC mode AFM was performed using a Pico plus 5500 ILM AFM (Agilent Technologies USA) with a piezo scanner with maximum range of 9  $\mu\text{m}$ . Micro fabricated silicon cantilevers 225  $\mu\text{m}$  in length with a nominal spring force constant of 21-98 N/m were used from Nano sensors, USA. Cantilever oscillation frequency was tuned into resonance frequency. The cantilever resonance frequency was 150-300 kHz. The images (256 by 256 pixels) were captured with a scan size of between 0.5 and 5  $\mu\text{m}$  at the scan speed rate of 0.5

lines/S. Images were processed by flattening using Pico view1.4 version software (Agilent Technologies, USA). Image manipulation has been done through Pico Image Advanced version software (Agilent Technologies, USA).

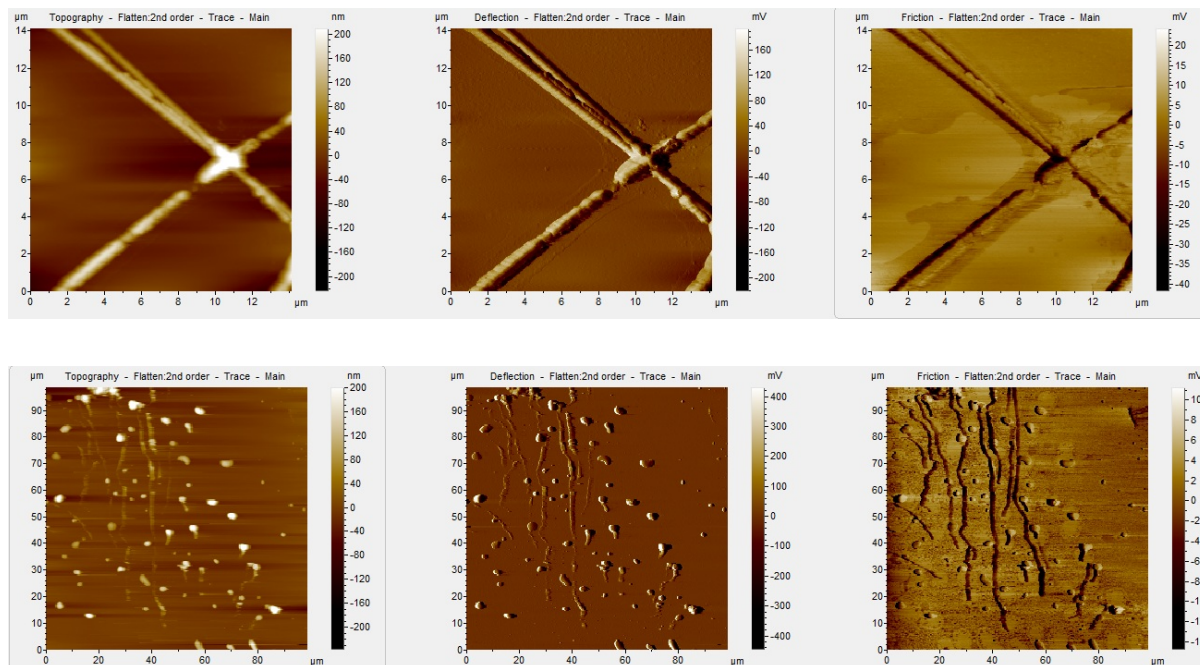

AFM images of **2a** and **2b** in (CH<sub>3</sub>CN:H<sub>2</sub>O) and (2:3) CDCl<sub>3</sub>:CCl<sub>4</sub> respectively.

### FT-IR Studies:

FT-IR Measurements were made on a JASCO FT/IR-400 Spectrophotometer using 5-10 mM solution in CHCl<sub>3</sub> of compound placed in a NaCl cell.



### Preparation of compounds 1 and 8 :

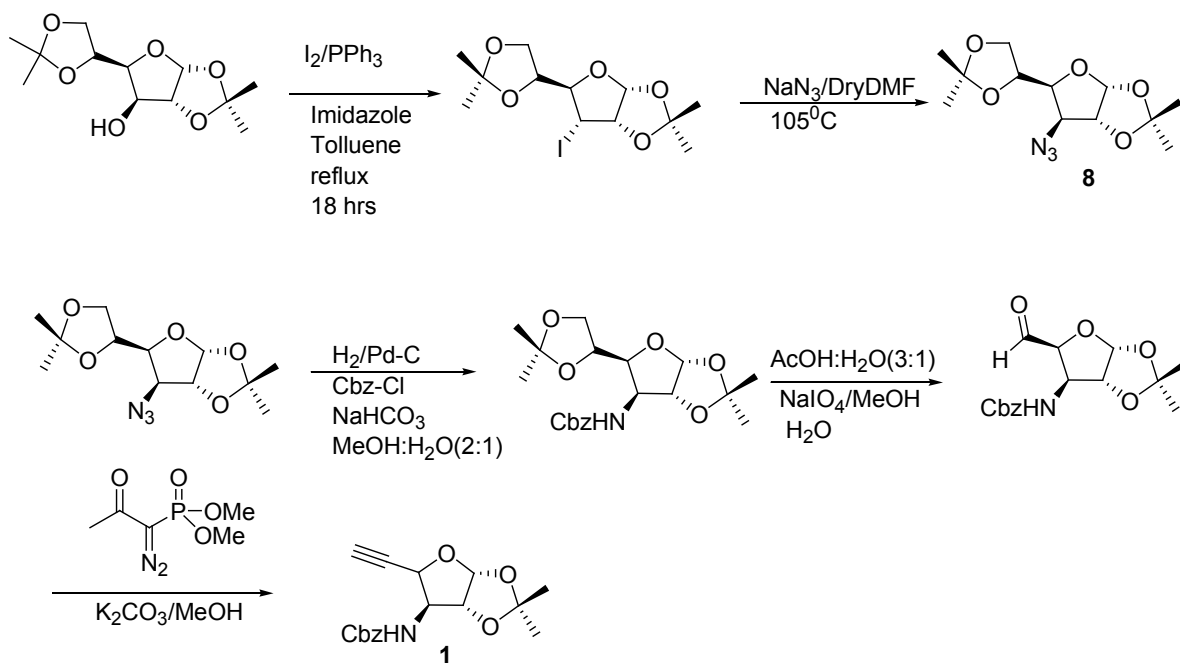

## Synthetic Scheme for Peptidomimetic Macrocycle 2a:

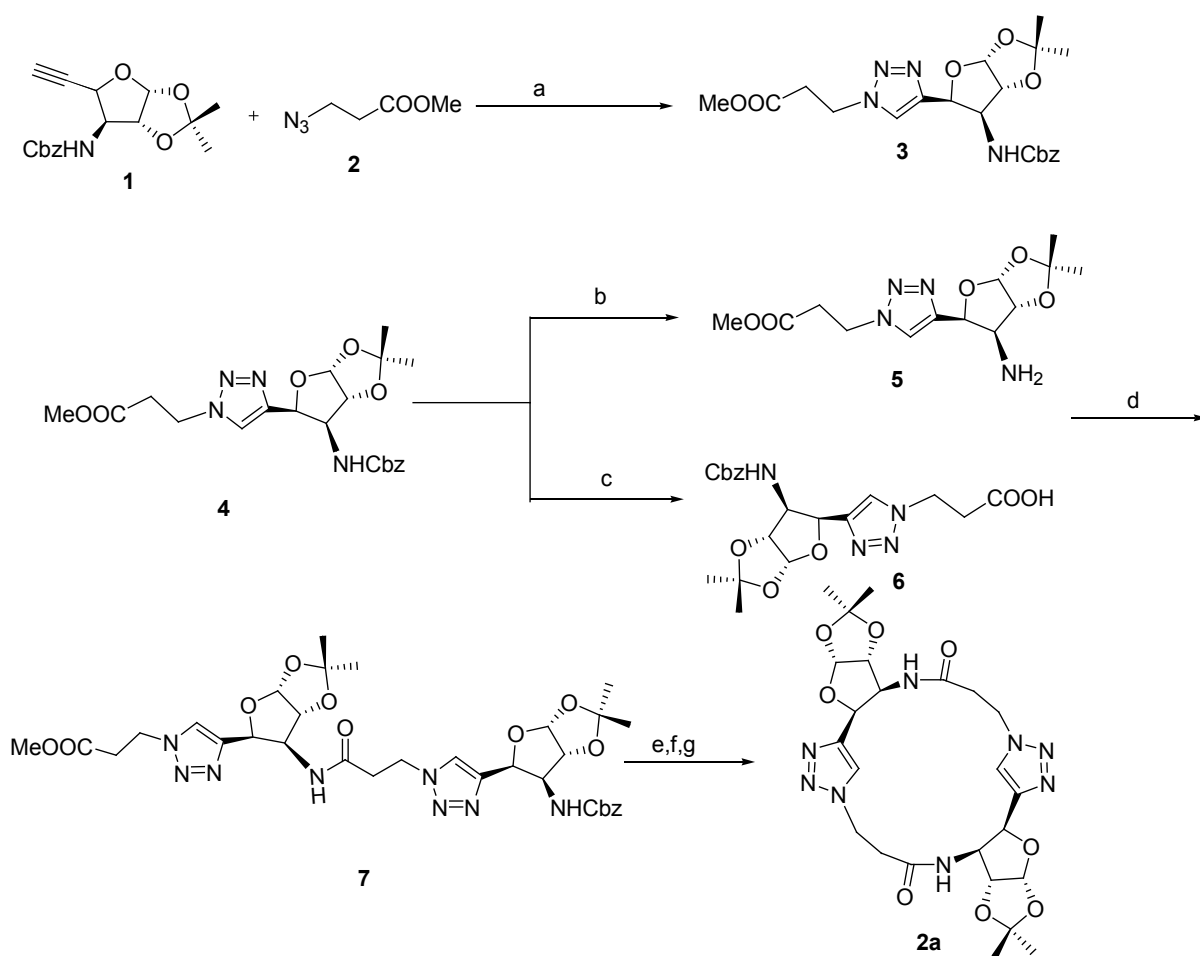

**Scheme 1.** Synthesis of Peptidomimetic Macrocycle **2a**: a) CuSO<sub>4</sub>·5H<sub>2</sub>O, Na-L-Ascorbate, TBTA, <sup>t</sup>BuOH:H<sub>2</sub>O(2:1) b) H<sub>2</sub>, Pd-C, MeOH c) LiOH·H<sub>2</sub>O, THF:H<sub>2</sub>O(3:1) d) EDC.HCl, HOBT, DCM e) LiOH, THF:H<sub>2</sub>O(3:1) f) EDC.HCl, Pfp-OH g) H<sub>2</sub>/Pd-C

## Synthetic Scheme for Peptidomimetic Macrocycle **2b**:

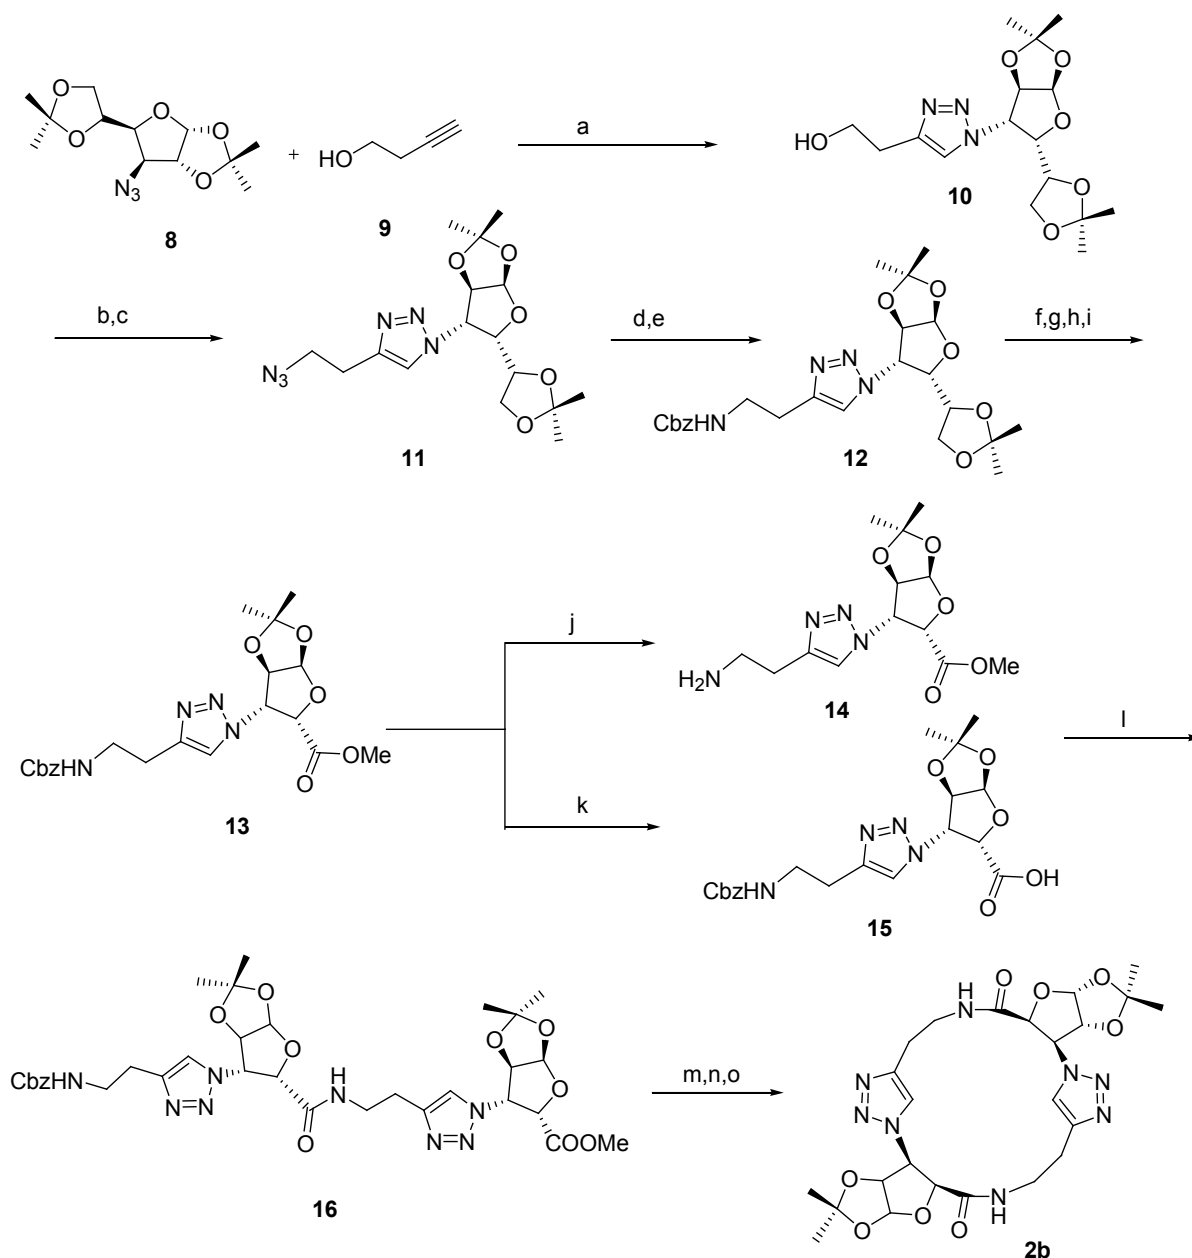

**Scheme 1.** Synthesis of Peptidomimetic Macrocycle **2b**: a)  $\text{CuSO}_4 \cdot 5\text{H}_2\text{O}$ , Na-L-Ascorbate, TBTA,  ${}^t\text{BuOH}:\text{H}_2\text{O}(2:1)$  b)  $\text{MsCl}$ ,  $\text{Et}_3\text{N}$ , DCM c)  $\text{NaN}_3$ , DMF d)  $\text{SnCl}_2$ ,  $\text{PhSH}$ ,  $\text{Et}_3\text{N}$ ,  $\text{CH}_3\text{CN}$  e)  $\text{CbzCl}$ ,  $\text{NaHCO}_3$ ,  $\text{MeOH}:\text{H}_2\text{O}(2:1)$  f)  $\text{AcOH}:\text{H}_2\text{O}(3:1)$  g)  $\text{NaIO}_4$ ,  $\text{MeOH}:\text{H}_2\text{O}$  h)  $\text{NaClO}_2$ ,  $\text{Na}_2\text{HPO}_4$ ,  $\text{H}_2\text{O}_2(30\%)$ ,  $\text{CH}_3\text{CN}$  i)  $\text{MeI}$ ,  $\text{NaHCO}_3$ , DMF j)  $\text{H}_2$ , Pd-C, MeOH k)  $\text{LiOH} \cdot \text{H}_2\text{O}$ ,  $\text{THF}:\text{H}_2\text{O}(3:1)$  l) EDC.HCl, HOBT, DCM m)  $\text{LiOH}$ ,  $\text{THF}:\text{H}_2\text{O}(3:1)$  n)  $\text{H}_2/\text{Pd-C}$ , EtOAc o) DPPA/ $\text{Et}_3\text{N}$

## Preparation and Characterization of Intermediates for 2a:

### Cbz protected dimer methyl ester (**3**):

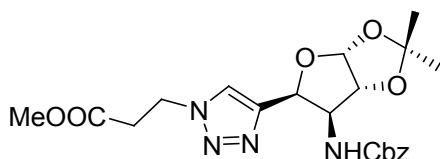

To a mixture of azido methyl ester (245 mg, 1 mmol) and alkyne (475.5 mg, 1.5 mmol) in tert-butanol was slowly added a solution of  $\text{CuSO}_4 \cdot 5\text{H}_2\text{O}$  (373.5 mg, 1.5 mmol) and TBTA (catalytic amount) in 2:1 tert-butanol: $\text{H}_2\text{O}$  (35 mL). Sodium L-Ascorbate (990 mg, 5 mmol) was introduced to the reaction mixture; it was stirred for another 16 hr, quenched with saturated NaCl solution, and extracted with DCM (3×25 mL). The combined organic layers were dried over  $\text{Na}_2\text{SO}_4$  and concentrated under vacuum to afford a yellow solid. The solid was purified by column chromatography (PE: EA, 1:2) to yield Cbz dimer methyl ester (**3**) as Yellow viscous liquid (55%).

$^1\text{H NMR}$  ( $\text{CDCl}_3$ , 300 MHz,  $\delta$ ): 7.70 (s, 1H), 7.34 (m, 5H), 5.95 (d,  $J = 3.6$  Hz), 5.46 (d,  $J = 3.6$  Hz), 5.04 (m, 3H), 4.82 (broad, 1H), 4.63 (t,  $J = 6.3$  Hz, 2H), 3.68 (s, 3H), 2.94 (t,  $J = 6.3$  Hz, 2H).  $^{13}\text{C NMR}$  ( $\text{CDCl}_3$ , 75 MHz,  $\delta$ ): 170.9, 155.9, 136.2, 128.4, 128.1, 124.2, 112.0, 104.1, 84.5, 72.4, 66.9, 59.3, 52.2, 45.6, 34.3, 31.7, 29.6, 29.3, 26.5, 26.0, 22.6. **HRMS**:  $(\text{M}+\text{Na})^+$  for  $\text{C}_{21}\text{H}_{46}\text{N}_4\text{O}_7\text{Na}$ : calculated 446.1802, found: 446.1795.

### Cbz protected terramer methyl ester (7):

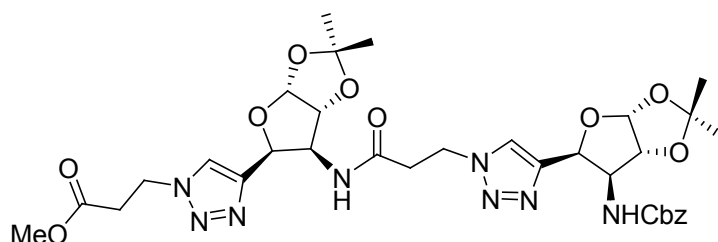

To a solution of compound **3** (60 mg, 0.107 mmol) in EtOAc:MeOH (1:1), 10% w/w Pd-C (15 mg) was added and the mixture was stirred for 2 hr under H<sub>2</sub> at one atmospheric pressure. After the completion of reaction (TLC), the mixture was filtered through a small pad of celite, washed with MeOH (2×10 mL) and the combined filtrate was concentrated under reduced pressure to afford the corresponding amino ester as colorless semisolid (**4**).

To a stirred solution of compound **4** (60 mg, 0.107 mmol) in 15 mL THF:H<sub>2</sub>O (3:1) at 0<sup>o</sup>C, LiOH.H<sub>2</sub>O (13.2 mg, 0.321 mmol) was added and stirred for 1 hr. The reaction mixture was acidified with aqueous sodium bisulphate solution and extracted with ethyl acetate (6×10 mL). The combined organic layer was dried over Na<sub>2</sub>SO<sub>4</sub> and concentrated under reduced pressure to furnish the corresponding acid **5** as white solid (95 %).

To a stirred solution of compound **5** (50 mg, 0.092 mmol) in dry CH<sub>2</sub>Cl<sub>2</sub> were added HOBt (12 mg, 0.092 mmol) and EDC.HCl (18 mg, 0.092 mmol) at 0<sup>o</sup>C. After stirring for 1hr at 0<sup>o</sup>C the amino ester (40 mg, 0.092 mmol) was introduced to the reaction mixture and stirred for further 24 hr at room temperature under N<sub>2</sub>. It was subsequently washed with 1(N) HCl (1×25 mL), 5% aq. NaHCO<sub>3</sub> (1×25 mL), and saturated NaCl solution (1×20 mL), and finally dried over Na<sub>2</sub>SO<sub>4</sub>. The organic layer was concentrated to give a yellow solid which was purified by column chromatography using (1:2) PE:EA as

eluent to afford the corresponding Cbz tetramer methyl ester **6** (67%) as white solid.

To the solution of compound **7** (30 mg, 0.032 mmol) in 25 mL THF:H<sub>2</sub>O (3:1) at 0°C, LiOH.H<sub>2</sub>O (3.8 mg, 0.096 mmol) was added and the mixture was stirred for 1hr. After the completion of reaction (TLC) it was acidified by aqueous NaHSO<sub>4</sub> and extracted with ethyl acetate (3×25 mL). The combined organic layer was dried over Na<sub>2</sub>SO<sub>4</sub> and concentrated under reduced pressure to furnish the corresponding Cbz tetramer acid as white solid (95 %).

To a stirred solution of Cbz tetramer acid (25 mg, 0.026 mmol) in dry CH<sub>2</sub>Cl<sub>2</sub> was added EDC.HCl (6 mg, 0.032 mmol) at 0°C. After stirring at 0°C for 10 min pentafluorophenol (10 mg, 0.039 mmol) was introduced to the reaction mixture and stirred overnight at room temperature under N<sub>2</sub>. It was washed subsequently with 1(N) HCl (1×25 mL) and saturated NaCl solution (1×20 mL), and dried over Na<sub>2</sub>SO<sub>4</sub>. After evaporating the solvent the residue was washed with n-hexane to furnish the Cbz tetramer pentafluorophenyl ester (85 %).

To a solution of compound Cbz tetramer pentafluorophenyl ester (20 mg, 0.018 mmol) in EtOAc, 10% (w/w) Pd-C (5 mg) was added and stirred for 12 hr under 1 atm Hydrogen pressure. After the completion of reaction (TLC) the reaction mixture was filtered through a small pad of celite and washed with MeOH (2×10 mL). The combined filtrate was concentrated under reduced pressure to afford the crude cyclic peptide which was purified by RP-HPLC (C<sub>18</sub> column/CH<sub>3</sub>CN/H<sub>2</sub>O).

**<sup>1</sup>H NMR** (CDCl<sub>3</sub>, 300 MHz, δ): 7.71 (s, 2H), 7.33 (s, 5H), 7.17 (d, J = 5.1 Hz, 1H), 6.10 (d, J = 4.2 Hz, 1H), 5.95 (d, J = 3.6 Hz, 1H), 5.93 (d, J = 3.6 Hz, 1H), 5.43 (d, J = 3.3 Hz, 1H), 5.39 (d, J = 3.3 Hz, 1H), 5.05 (m, 2H), 4.83 (broad, 1H), 4.64 (m, 6H), 4.38 (m, 2H), 4.26 (broad, 1H), 3.69 (s, 3H), 2.95 (t, J = 12.0 Hz, 2H), 2.76 (m, 2H), 1.57 (s, 6H), 1.34 (s, 6H). **<sup>13</sup>C NMR**



(CDCl<sub>3</sub>, 75 MHz,  $\delta$ ): 171.0, 169.5, 156.0, 142.0, 136.2, 128.5, 128.1, 124.6, 124.5, 121.2, 111.9, 104.1, 84.5, 84.1, 72.2, 71.6, 66.8, 59.4, 58.3, 52.2, 45.7, 45.6, 35.9, 34.2, 26.6, 26.5, 26.08, 26.05. **HRMS** (M+Na)<sup>+</sup> calculated for C<sub>33</sub>H<sub>42</sub>N<sub>8</sub>O<sub>11</sub>Na: 726.2973, found: 726.2990.

### Pseudo Cyclo- $\beta$ -Peptide (2a):

<sup>13</sup>C NMR (CDCl<sub>3</sub>, 75 MHz,  $\delta$ ): 171.7, 141.6, 126.7, 113.1, 104.9, 85.2, 73.1, 58.1, 46.8, 36.0, 26.6, 26.3, 24.4. **FTIR** (KBr, 298K): 3280 (amide A); 3159, 3098, 2990, 2925, 1672 (amide I); 1569 (amide I<sub>II</sub>); 1435. **HRMS** (M+Na)<sup>+</sup> calculated for C<sub>24</sub>H<sub>32</sub>N<sub>8</sub>O<sub>8</sub>Na: 560.2343, observed: 560.2335.

### Preparation and Characterization of Intermediates for 2b:

#### Triazolyl alcohol (10):

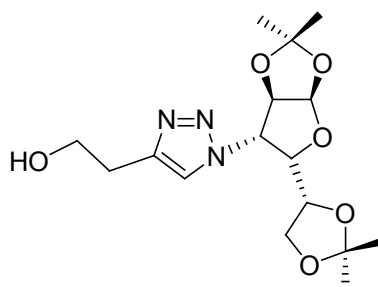

To a mixture of 3-azido (1,2;5,6) di-isopropylidene glucofuranose (500 mg, 1.75 mmol) and 3-butyn-1-ol (0.22 mL, 2.63 mmol) in tert-butanol, was slowly added a solution of CuSO<sub>4</sub>·5H<sub>2</sub>O (655.2 mg, 2.63 mmol) and TBTA (catalytic amount) in 2:1 tert-butanol:H<sub>2</sub>O (35 mL). Sodium L-Ascorbate (1.7 g, 8.75 mmol) was introduced to the reaction mixture; it was stirred for another 16 hr. After the completion of reaction the reaction mixture was quenched with saturated NaCl solution and extracted with DCM (3×25 mL). The combined organic layers were dried over Na<sub>2</sub>SO<sub>4</sub> and concentrated. The crude product was

purified by (3% MeOH in DCM) to yield triazolyl alcohol (**6**) as a colourless liquid (55%).

$^1\text{H NMR}$  ( $\text{CDCl}_3$ , 600 MHz,  $\delta$ ): 7.66 (s, 1H), 6.24 (s, 1H), 5.17 (s, 1H), 4.34 (dd,  $J=3.6, 9$  Hz, 1H), 3.96 (m, 1H), 3.94 (m, 2H), 3.12 (m, 2H), 2.95 (m, 2H), 1.59 (s, 3H), 1.44 (s, 3H), 1.38 (s, 3H), 1.23 (s, 3H).

$^{13}\text{C NMR}$  ( $\text{CDCl}_3$ , 150 MHz,  $\delta$ ): 112.5, 109.7, 106.3, 83.4, 80.4, 72.3, 67.5, 65.7, 61.6, 28.5, 26.9, 26.7, 26.1, 25.0.

**HRMS** ( $\text{M}+\text{Na}$ ) $^+$  Calculated for  $\text{C}_{16}\text{H}_{25}\text{N}_3\text{O}_6$ : 355.3862, Found 355.3869.

### Sugar Triazolyl Azide (**11**):

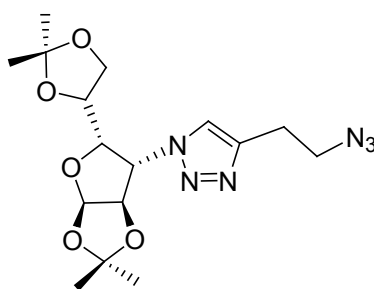

To a stirred solution of alcohol **6** (500 mg, 1.4 mmol) in dry DCM, triethyl amine (0.36 mL, 2.8 mmol) was added at  $0^\circ\text{C}$ . After 15 minutes methane sulphonyl chloride (0.17 mL, 2.1 mmol) was added to the reaction mixture. It was stirred for another 1 hr at  $0^\circ\text{C}$ . After the completion of reaction (TLC control) reaction mixture was poured in to ice-cold water and extracted by DCM ( $3 \times 20$  mL). The combined organic layer was evaporated under vacuum to give the crude mesyl ester which was dissolved in dry DMF.  $\text{NaN}_3$  (125 mg, 3.2 mmol) was added to the solution. It was stirred at  $70^\circ\text{C}$  for 2 hr. EtOAc was added to the reaction mixture and it was extracted with water ( $2 \times 20$  mL) followed by brine ( $1 \times 20$  mL). The organic layer was dried over  $\text{Na}_2\text{SO}_4$  and

evaporated to yield the crude azide compound which was purified by column chromatography (PE:EA, 3:1) as white crystalline solid (80% over two steps).

$^1\text{H NMR}$  ( $\text{CDCl}_3$ , 300 MHz,  $\delta$ ): 7.62 (s, 1H), 6.24 (d,  $J=3.6$  Hz, 1H), 5.21 (d,  $J=3.6$  Hz, 1H), 4.99 (d,  $J=3.6$  Hz, 1H), 4.32 (dd,  $J=3.6, 9.0$  Hz, 1H), 3.94 (m, 2H), 3.81 (m, 2H), 3.27 (m, 1H), 3.22 (m, 2H), 3.12 (m, 2H), 1.59 (s, 3H), 1.45 (s, 3H), 1.38 (s, 3H), 1.23 (s, 3H).

$^{13}\text{C NMR}$  ( $\text{CDCl}_3$ , 75 MHz,  $\delta$ ): 143.7, 124.1, 112.4, 109.6, 106.3, 83.3, 80.6, 72.1, 67.5, 65.5, 43.6, 42.8, 29.0, 26.8, 26.7, 26.1, 24.9.

**HRMS** ( $\text{M}+\text{Na}$ ) $^+$  Calculated for  $\text{C}_{16}\text{H}_{24}\text{N}_6\text{O}_5\text{Na}$ : 380.1808, Found: 380.1798.

### **Cbz-Protected Sugar Triazolyl Amine (12):**

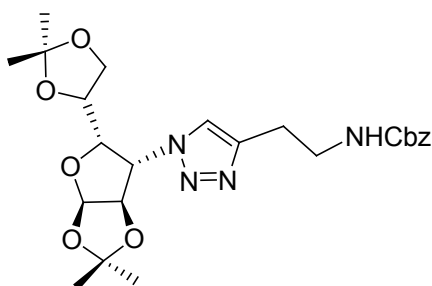

To a solution of triazolyl azide **11** (300 mg, 0.78 mmol) in acetonitrile, triethyl amine (0.35 mL, 1.58 mmol) and  $\text{SnCl}_2 \cdot \text{H}_2\text{O}$  (166 mg, 1.2 mmol) were added. To this stirred solution PhSH (0.1 mL, 0.5 mmol) was added at room temperature. After the complete consumption of azide (TLC control), aqueous  $\text{NaHCO}_3$  was added to the mixture and extracted with DCM ( $5 \times 15$  mL). The combined organic extract was dried over  $\text{Na}_2\text{SO}_4$  and evaporated to give crude amine which was directly dissolved in MeOH: $\text{H}_2\text{O}$  (2:1). To this solution  $\text{NaHCO}_3$  (100 mg, 1.2 mmol) was added followed by Cbz-Cl at  $0^\circ\text{C}$ . The

stirring was continued for another 2 hr. After the completion of reaction the solvent was removed under reduced pressure and residue was extracted with EtOAc (3×20 mL). The combined organic layer was dried over Na<sub>2</sub>SO<sub>4</sub> and evaporated to give crude product which was again purified by column chromatography (PE:EA, 1:2) as white crystalline solid (60% over two steps).

<sup>1</sup>H NMR (CDCl<sub>3</sub>, 300 MHz, δ): 7.48 (s, 1H), 7.34 (m, 5H), 6.22 (d, J=3.6 Hz, 1H), 5.27 (broad, 1H), 5.15 (d, J=3.6 Hz, 1H), 5.08 (m, 2H), 4.95 (d, J=3.6 Hz, 1H), 4.32 (dd, J=3.6, 9 Hz, 1H), 3.93 (m, 2H), 3.55 (m, 2H), 3.09 (m, 1H), 2.94 (m, 2H), 1.43 (s, 3H), 1.37 (s, 3H), 1.25 (s, 3H), 1.20 (s, 3H).

<sup>13</sup>C NMR (CDCl<sub>3</sub>, 75 MHz, δ): 175.3, 156.4, 144.7, 136.4, 128.5, 128.1, 128.0, 123.6, 112.5, 109.7, 106.3, 83.4, 80.4, 72.3, 67.4, 66.6, 65.5, 40.2, 29.6, 26.9, 26.7, 26.1, 25.8, 24.9.

HRMS (M+Na)<sup>+</sup> Calculated for C<sub>16</sub>H<sub>25</sub>N<sub>3</sub>O<sub>6</sub>Na: 488.2271, Found 488.2267.

### **Cbz-Protected sugar Triazole Amino acid:**

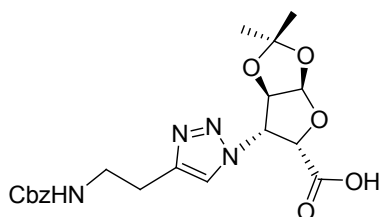

Compound **3** (300 mg, 0.6 mmol) was dissolved in AcOH:H<sub>2</sub>O (3:1 v/v) and the reaction mixture was stirred overnight at RT. After completion of the reaction (TLC) the mixture was evaporated on a rotary evaporator and dried with azeotropic removal of water. The crude diol was dissolved in aqueous MeOH followed by the addition of sodium periodate (160 mg, 0.75 mmol, added portionwise) at 0°C. After 5 h, the reaction mixture was filtered, evaporated, and

the aqueous part was extracted with DCM (3×25 mL). The combined organic layer was dried over Na<sub>2</sub>SO<sub>4</sub> and evaporated to furnish the aldehyde (70%) as colourless oil which was used for the next step without further purification.

The aldehyde (200 mg, 0.48 mmol) was dissolved in acetonitrile (5 mL) and to this were added solutions of NaClO<sub>2</sub> (65 mg, 0.72 mmol) in 9 mL of water and NaH<sub>2</sub>PO<sub>4</sub> (112 mg, 0.72 mmol) in 5 mL of water, and 30% H<sub>2</sub>O<sub>2</sub> (0.1 mL, 2.4 mmol) at 0°C. The reaction mixture was stirred overnight at room temperature, the solvent was removed under reduced pressure and the remaining content was basified by adding 5% aqueous solution of NaHCO<sub>3</sub>. The aqueous phase was extracted with DCM (3×10 mL), and then acidified by NaHSO<sub>4</sub>. The acidic layer was further extracted with EtOAc (4×15 mL) and dried over Na<sub>2</sub>SO<sub>4</sub>. Evaporation of solvent under reduced pressure gave the acid as white foam.

### **CBz-Protected Sugar Triazolyl Methyl Ester (13):**

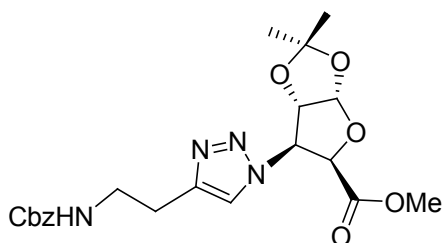

To a solution of acid **4** (100 mg, 0.23 mmol) in dimethyl formamide NaHCO<sub>3</sub> (40 mg, 0.46 mmol) and iodomethane (0.03 mL, 0.46 mmol) were added. The reaction was stirred for 4 h. EtOAc was added to the reaction mixture and it was extracted by aqueous Na<sub>2</sub>S<sub>2</sub>O<sub>3</sub> solution (2×15 mL) and brine (1×15 mL). The organic extract was dried over Na<sub>2</sub>SO<sub>4</sub> and evaporated under reduced pressure to give the corresponding methyl ester as colourless liquid (90%).

### **Cbz Protected tetramer methyl ester (16):**

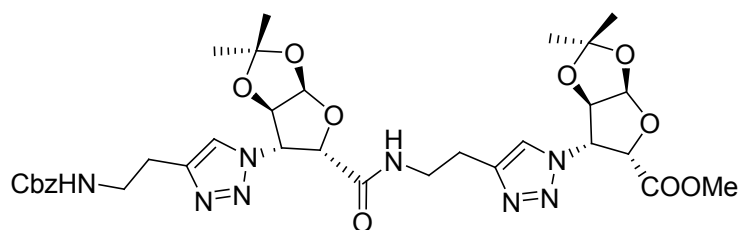

To a solution of compound **5** (60 mg, 0.107 mmol) in EtOAc:MeOH (1:1), 10% w/w Pd-C (15 mg) was added and the mixture was stirred for 2 hr under H<sub>2</sub> at one atmospheric pressure. After the completion of reaction (TLC), the mixture was filtered through a small pad of celite, washed with MeOH (2×10 mL) and the combined filtrate was concentrated under reduced pressure to afford the corresponding amino ester as colorless semisolid (**6**).

To a stirred solution of compound **4** (50 mg, 0.092 mmol) in dry CH<sub>2</sub>Cl<sub>2</sub> were added HOBt (12 mg, 0.092 mmol) and EDC.HCl (18 mg, 0.092 mmol) at 0<sup>o</sup>C. After stirring for 1hr at 0<sup>o</sup>C, the amino ester **6** (40 mg, 0.092 mmol) was introduced to the reaction mixture and stirred for further 24 hr at room temperature under N<sub>2</sub>. It was then subsequently washed with 1(N) HCl (1×25 mL), 5% aq. NaHCO<sub>3</sub> (1×25 mL), and saturated NaCl solution (1×20mL), then dried over Na<sub>2</sub>SO<sub>4</sub>. The organic layer was concentrated to give a yellow solid which was purified by column chromatography using 4% MeOH in DCM as eluent to afford the corresponding Cbz tetramer methyl ester **7** (55%) as white solid.

<sup>1</sup>H NMR (CDCl<sub>3</sub>, 600 MHz, δ): 7.44 (s, 1H), 7.34 (m, 5H), 7.32 (s, 1H), 6.53 (broad, 1H), 6.42 (d, J=3.6 Hz, 1H), 6.35 (d, J=3.6 Hz, 1H), 5.38 (m, 2H), 5.29 (d, J=4.2 Hz, 1H), 5.13 (m, 2H), 5.10 (m, 2H), 5.02 (m, 1H), 4.96 (d, J=3.6 Hz, 1H), 3.58 (m, 1H), 3.55 (s, 3H), 3.52 (m, 2H), 3.32 (m, 1H), 3.25 (m, 1H), 2.89 (m, 2H), 2.57 (m, 1H), 2.36 (m, 1H) 1.58 (s, 3H), 1.56 (s, 3H), 1.38 (s, 3H), 1.36 (s, 3H).



$^{13}\text{C}$  NMR ( $\text{CDCl}_3$ , 150 MHz,  $\delta$ ): 166.9, 166.3, 144.6, 136.5, 128.5, 128.0, 123.6, 121.7, 113.3, 113.1, 106.7, 105.9, 83.4, 83.1, 80.3, 78.2, 66.6, 66.2, 65.6, 52.6, 40.0, 37.7, 30.9, 26.9, 26.7, 26.3, 26.2, 25.7, 25.3.

HRMS ( $\text{M}+\text{Na}$ ) $^+$  Calculated for  $\text{C}_{16}\text{H}_{25}\text{N}_3\text{O}_6$ : 726.2973, Found: 726.2968.

### Pseudo-cyclo- $\beta$ -peptide **2b**:

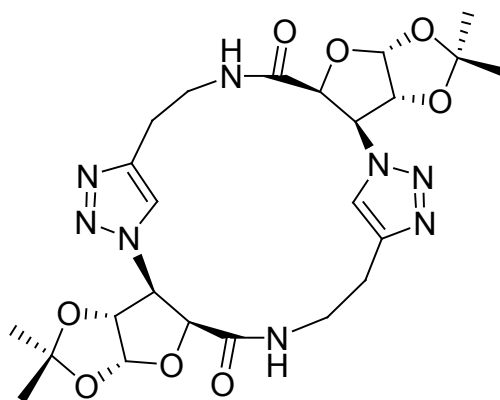

To a solution of **16** in THF:  $\text{H}_2\text{O}$  (3:1)  $\text{LiOH}\cdot\text{H}_2\text{O}$  was added at  $0^\circ\text{C}$  and stirring was continued for another 1 hr. After the completion of reaction the mixture was acidified by  $\text{NaHSO}_4$  and extracted by EtOAc ( $4\times 10$  mL). The combined organic layer was dried over  $\text{Na}_2\text{SO}_4$  and evaporated under rotary to give the crude tetramer Cbz-protected acid (**17**) as white solid.

To a solution of **17** (30 mg, 0.040 mmol) in EtOAc:MeOH (1:1), 10% (w/w) Pd-C (10 mg) was added and stirred for 2 hr under 1 atmosphere Hydrogen pressure. After the completion of reaction (TLC) the reaction mixture was filtered through a small pad of celite which was then washed with MeOH ( $2\times 10$  mL). The combined filtrate was concentrated under reduced pressure to afford the corresponding amino acid as colourless solid.

The crude product was dissolved in distilled acetonitrile (5 mL) at 0°C then DIEA (0.6 mmol) and DPPA (0.4 mmol) were added. The mixture was stirred for 48 h at room temperature. After evaporation of solvent under reduced pressure, the crude material was dissolved in ethyl acetate (20 mL) and washed with saturated NaHCO<sub>3</sub> solution (2 × 10 mL), saturated NH<sub>4</sub>Cl solution (2 × 10 mL) then brine (10 mL). The organic layer was dried over Na<sub>2</sub>SO<sub>4</sub> and evaporated under reduced pressure to afford the crude product which was purified by HPLC (C18 column/CH<sub>3</sub>CN/H<sub>2</sub>O).

<sup>13</sup>C NMR (CDCl<sub>3</sub>, 150 MHz, δ): 166.6, 144.9, 121.9, 112.9, 106.6, 82.3, 80.4, 65.7, 38.1, 26.7, 26.2, 24.0. [α]<sub>D</sub><sup>26</sup> = 1.8 (c=1, CHCl<sub>3</sub>). HRMS (M+Na)<sup>+</sup> calculated for C<sub>24</sub>H<sub>32</sub>N<sub>8</sub>O<sub>8</sub>Na: 560.2343, observed: 560.2352.

### Structural Determination by Multidimensional NMR:

NMR Spectra (1D and 2D) of the Pseudo cyclic peptides **2a** and **2b** were recorded by Bruker Avance-600 MHz with TCI CYROPROBE in Acetonitrile-d<sub>3</sub> or (2:3) CDCl<sub>3</sub>:CCl<sub>4</sub> using tetra methyl silane for CDCl<sub>3</sub> as internal standard and chemical shifts are shown in ppm. All the two dimensional NMR studies (DQF COSY, ROESY) were carried out in phase-sensitive mode. The 2D spectra were acquired with 2×256 or 2×192 free induction decays (FID) containing 16-32 scans with relaxation delays of 1.5s. The ROESY experiments were performed with mixing time of 0.2 to 0.3 s and the TOCSY experiments were performed with mixing time of 0.02 s. The two dimensional data were processed with Gaussian apodization in both the dimensions. The spectra (One Dimensional, DQF COSY and ROESY) are given in the supporting information.

<sup>1</sup>H-<sup>1</sup>H ROESY cross peaks at 300 ms were assigned and integrated and the respective volumes were converted to distance restraints. When symmetric pairs of cross peaks were present, the larger peak volume was converted to the

distance restraint. Cross-peaks were categorized as strong, medium, weak, and very weak based on their intensities. Inter-proton distances ( $r$ ) were derived from the ROE intensities ( $S$ ) with the known relationship  $r = c(S)^{-1/6}$ , where  $c$  is a coefficient determined on the basis of ROE corresponding to a known distance. The distance constraints were determined from volume integrals of ROESY cross peaks using reference distance  $2.40 \text{ \AA}$  for vicinal cis-sugar ring protons. The conservative upper distances were fixed respectively as 3.5, 4.0, 4.5 and  $6.0 \text{ \AA}$  and the lower distance limit was fixed at  $2.0 \text{ \AA}$ . Corrections of  $0.1 \text{ \AA}$  were applied to the upper bound distances derived from NOEs to account for any spin diffusion effect. The dihedral angles ( $\varphi$ ) were calculated from the  $^3J_{\text{HN-H}\beta}$  coupling constants measured from the  $^1\text{H}$ - $^1\text{H}$  DQF-COSY spectra using the modified Karplus<sup>1</sup> equation. The  $\varphi$ 's thus obtained were used as dihedral restraints.

### **NMR Analysis:**

$^1\text{H}$  NMR spectra ( $\text{CD}_3\text{CN} + 2\% \text{ H}_2\text{O}$ ) of all entries in Table-1 were assigned from the corresponding double-quantum-filtered 2D DQF-COSY spectrum acquired at the concentration and temperature indicated. Spectra were acquired using Bruker-600MHz spectrometer as indicated for **2a** and **2b** and were referenced to residual  $\text{CHCl}_3$  solvent peak ( $7.24 \text{ ppm}$ ). Signals for S and  $\beta\text{-A}$  are shown in the structures of **2a** and **2b**.

| Residue name | NH/Tr                             | H <sub>α</sub>                   | H <sub>α'</sub> | H <sub>β</sub>                                              | H <sub>β'</sub> | H <sub>γ</sub>                    | H <sub>δ</sub>                   |
|--------------|-----------------------------------|----------------------------------|-----------------|-------------------------------------------------------------|-----------------|-----------------------------------|----------------------------------|
| S            | 7.76(d)<br>J <sub>NH,β</sub> =7.8 | 5.36(d)<br>J <sub>α,β</sub> =3.6 |                 | 4.22(dd)<br>J <sub>β,α</sub> =3.6<br>J <sub>β,NH</sub> =7.8 |                 | 4.64 (d)<br>J <sub>γ,δ</sub> =4.2 | 5.94(d)<br>J <sub>δ,γ</sub> =4.2 |
| β-A          | 7.61(s)                           | 2.77(m)                          | 2.84(m)         | 4.60(m)                                                     | 4.40(m)         |                                   |                                  |

Other Methyls: 1.20, 1.47

**Table 1:** <sup>1</sup>H NMR Chemical Shifts (ppm) (CD<sub>3</sub>CN+2%H<sub>2</sub>O, 600 MHz, 300K) and coupling constant (Hz) of pseudo-cyclo-β-peptide **2a**

| Residue Name | NH/Tr-H                                                       | CαH                                                                                 | Cα <sup>1</sup> H                                                                         | CβH                           | Cβ <sup>1</sup> H | CγH                           | CδH                           |
|--------------|---------------------------------------------------------------|-------------------------------------------------------------------------------------|-------------------------------------------------------------------------------------------|-------------------------------|-------------------|-------------------------------|-------------------------------|
| S            | 7.31(s)                                                       | 4.99<br>J <sub>β,α</sub> =3.6                                                       |                                                                                           | 5.12<br>J <sub>β,α</sub> =3.6 |                   | 5.38<br>J <sub>γ,δ</sub> =3.6 | 6.51<br>J <sub>γ,δ</sub> =3.6 |
| β-A          | 7.60(t)<br>J <sub>NH,β</sub> = 6.1<br>J <sub>NH,β'</sub> =5.4 | 2.64(ddd)<br>J <sub>α,α'</sub> = 16<br>J <sub>α,β'</sub> =9<br>J <sub>α,β</sub> = 3 | 2.41(ddd)<br>J <sub>α,α'</sub> = 16<br>J <sub>α',β</sub> =8.9<br>J <sub>α',β'</sub> = 2.8 | 3.37(m)                       | 3.29(m)           |                               |                               |

Other Methyls: 1.60, 1.25; S= Sugar; β-A= β-Alanine

**Table 2:** <sup>1</sup>H NMR Chemical Shifts (ppm) (CDCl<sub>3</sub>, 600 MHz, 300K) and coupling constant (Hz) of pseudo-cyclo-β-peptide **2b**

### NMR Studies:

NMR Spectra of the Pseudo cyclic peptide were recorded by Bruker 600 MHz in CH<sub>3</sub>CN-d<sub>3</sub> or (2:3) CDCl<sub>3</sub>:CCl<sub>4</sub> (7 mM) using tetramethyl silane as internal standard and chemical shifts are shown in ppm. The dihedral angles (φ) were

calculated from the  $^3J_{\text{HN-H}\beta}$  coupling constants measured from the DQF-Cosy spectra using the modified Karplus equation<sup>1</sup>.

### **Molecular Modeling studies:**

Construction of molecular model and structural analysis of different obtained conformations were achieved by Insight-II. The Discover software was used for molecular modelling calculation and also energy minimization. The CVFF MSI version with default parameter was used as a force field throughout the calculation in chloroform ( $\epsilon = 4.8$ ) and in vacuo ( $\epsilon = 1.8$ ) respectively for **2b** and **2a**. Structure refinement was carried out by incorporating NMR derived distance and torsion angle constraints. Energy minimization of each structure was carried out by steepest descent method followed by conjugate gradient method, until an RMS deviation of 0.001 Kcal was arrived.

(1) C. A. G. Haasnoot ; F. A. A. M. de Leeuw; H. P. M. de Leeuw; C. Altona, *Org. Magn. Reson.* **1981**, *15*, 43.

## 1D spectra of compound 2a:

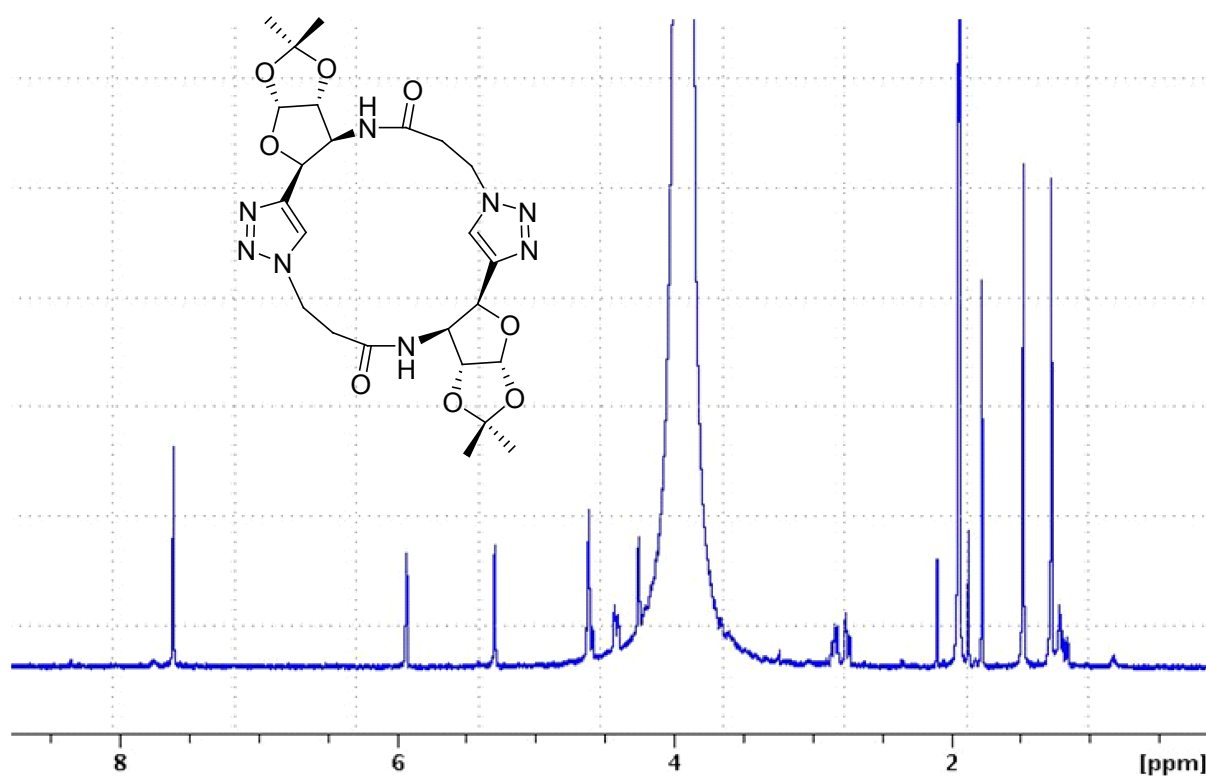

**Fig.1** <sup>1</sup>H NMR of compound **2a** (CD<sub>3</sub>CN +2%H<sub>2</sub>O, 600MHz, 300K)



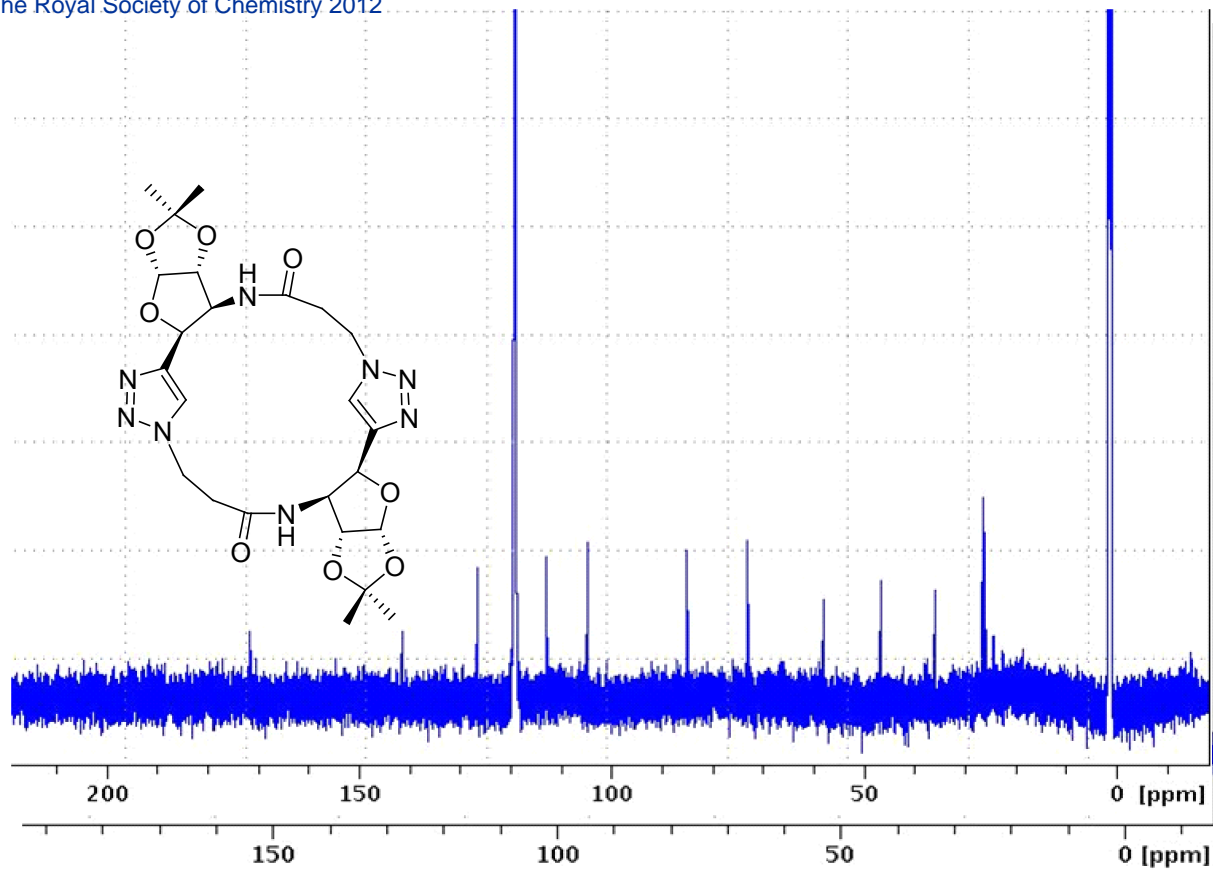

**Fig.2**  $^{13}\text{C}$ NMR spectrum of compound **2a** in  $\text{CD}_3\text{CN}+2\%\text{H}_2\text{O}$  at 298K in 600 MHz

## 2D NMR of compound 2a:

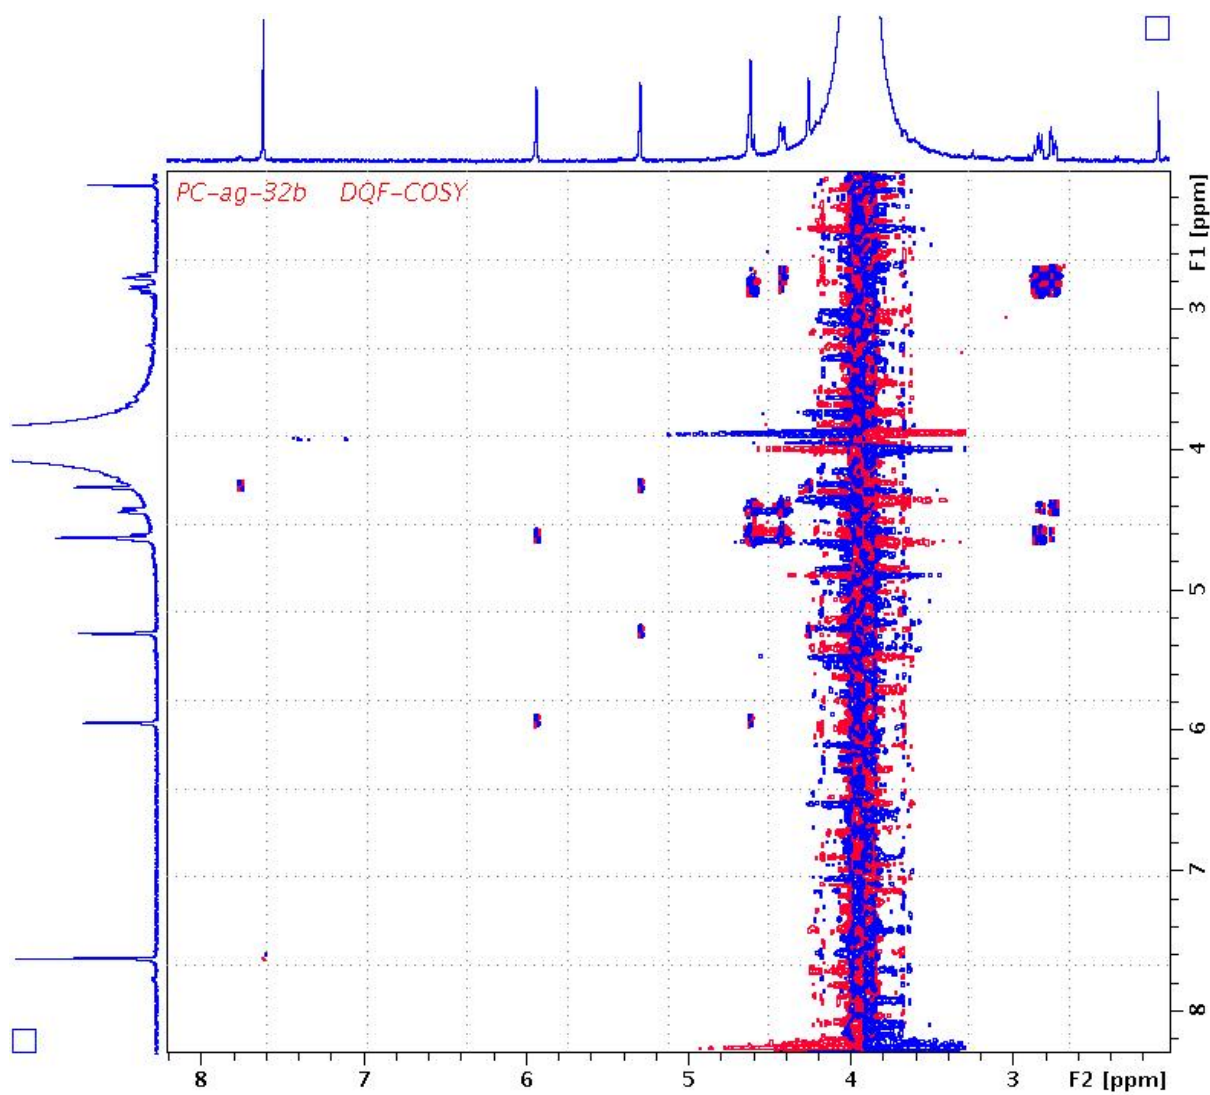

**Fig.3**  $^1\text{H}$ - $^1\text{H}$  DQF-COSY of **2a** in  $\text{CD}_3\text{CN}+2\%\text{H}_2\text{O}$  at 298K in 600MHz

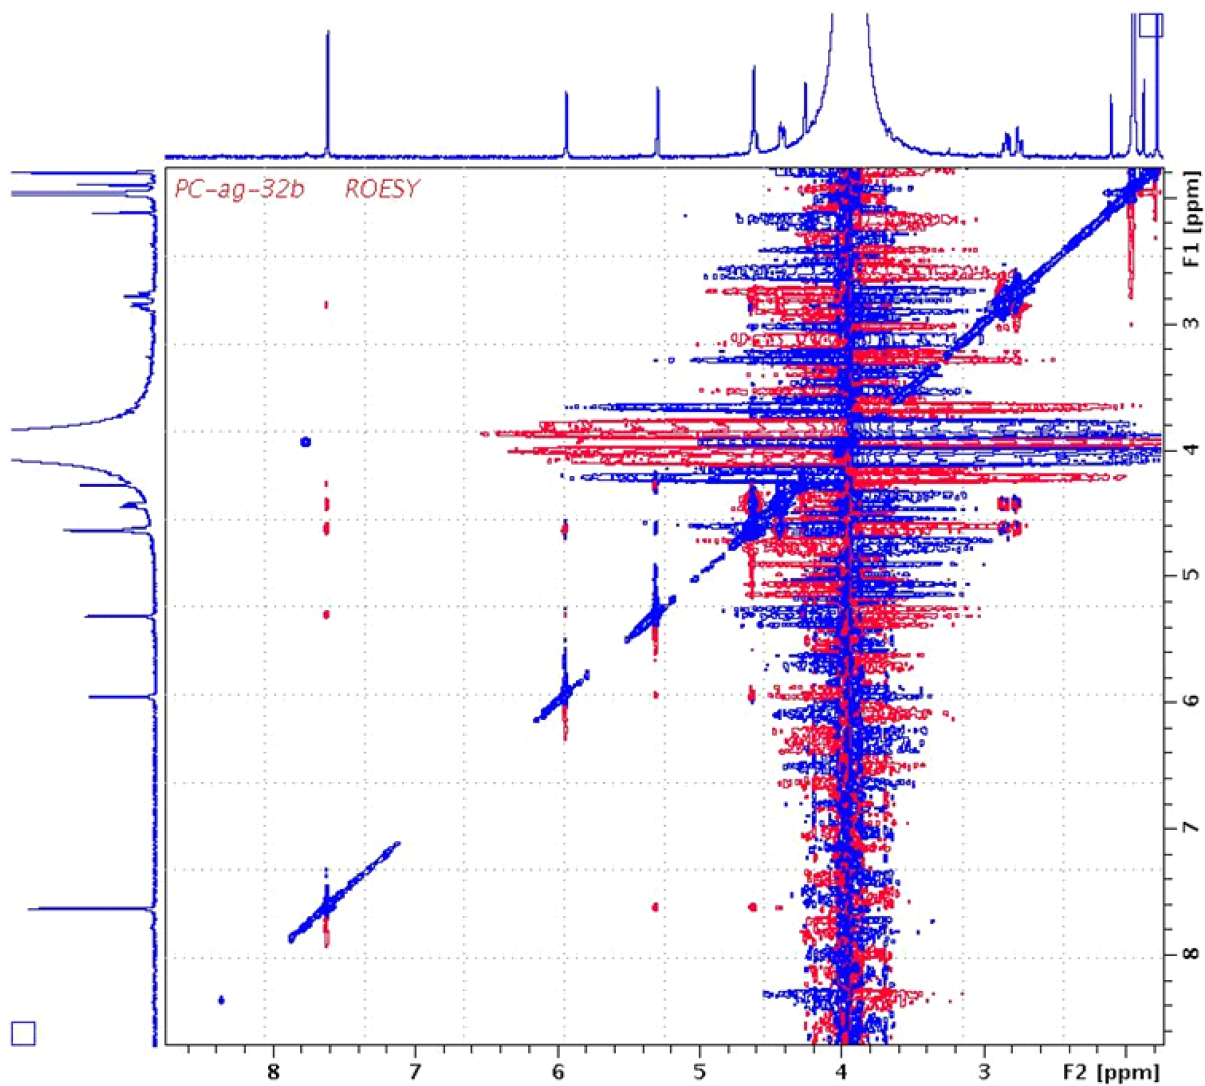

**Fig.4.**  $^1\text{H}$ - $^1\text{H}$  ROESY of compound **2a** in  $\text{CD}_3\text{CN}+2\%\text{H}_2\text{O}$  at 300K in 600MHz

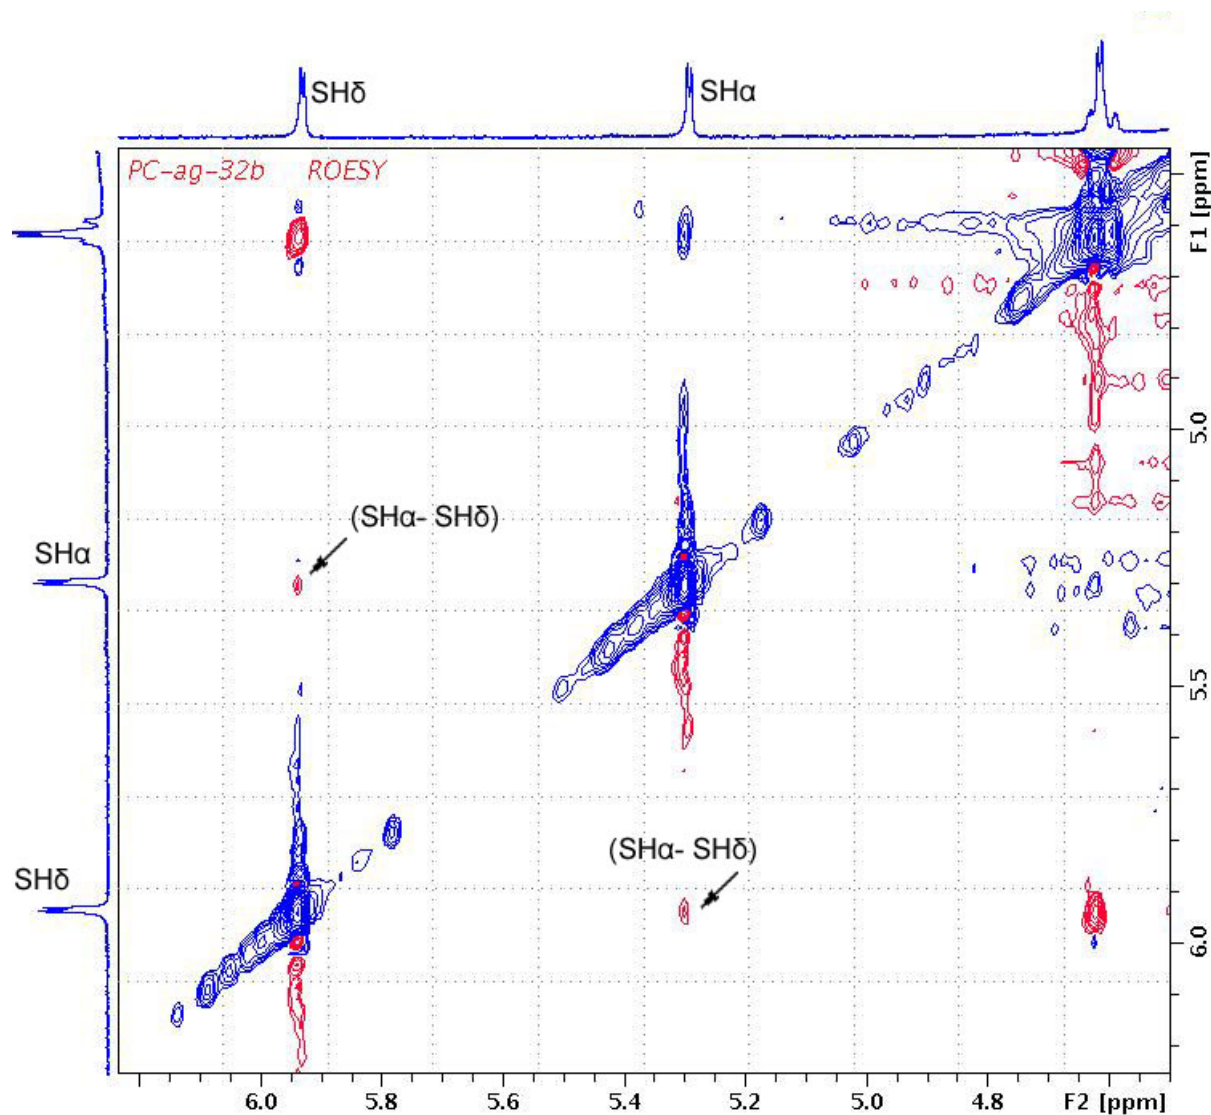

**Fig.5** Selected region of  $^1\text{H}$ - $^1\text{H}$  ROESY of **2a** in  $(\text{CD}_3\text{CN} + 2\% \text{H}_2\text{O})$  showing Parallel Homostacking between two sugar components as suggested by SH $\alpha$ -SH $\delta$  cross peaks.

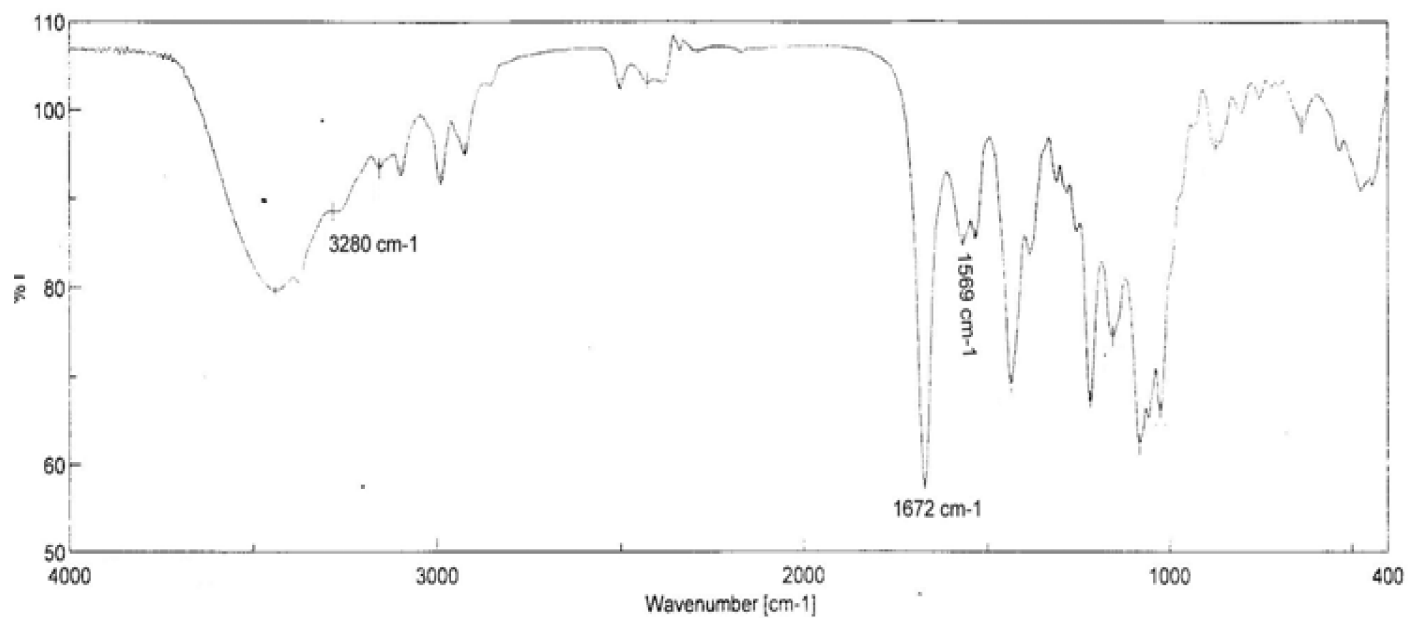

**Fig.6:** IR Spectrum of compound **2a** in KBr

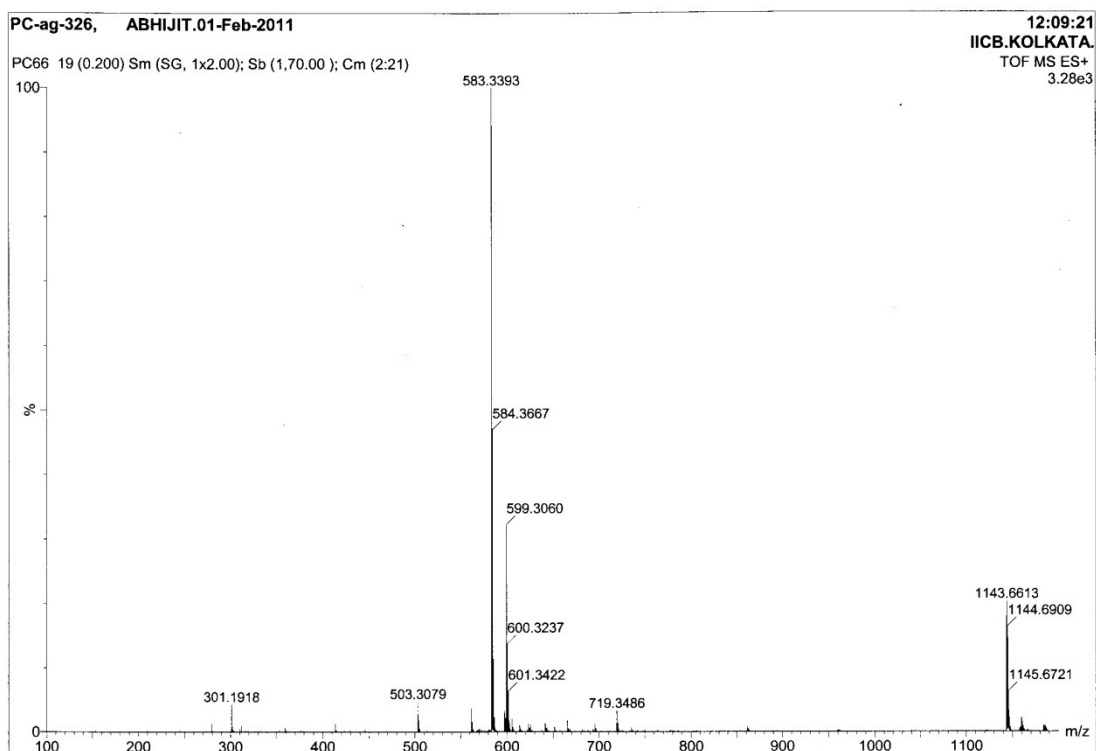

**Fig.7:** ESI mass Spectrum for compound **2a** in  $\text{CH}_3\text{CN} + 2\% \text{H}_2\text{O}$  showing Pseudomolecular monomeric and dimeric species

### 1D NMR compound 2b:

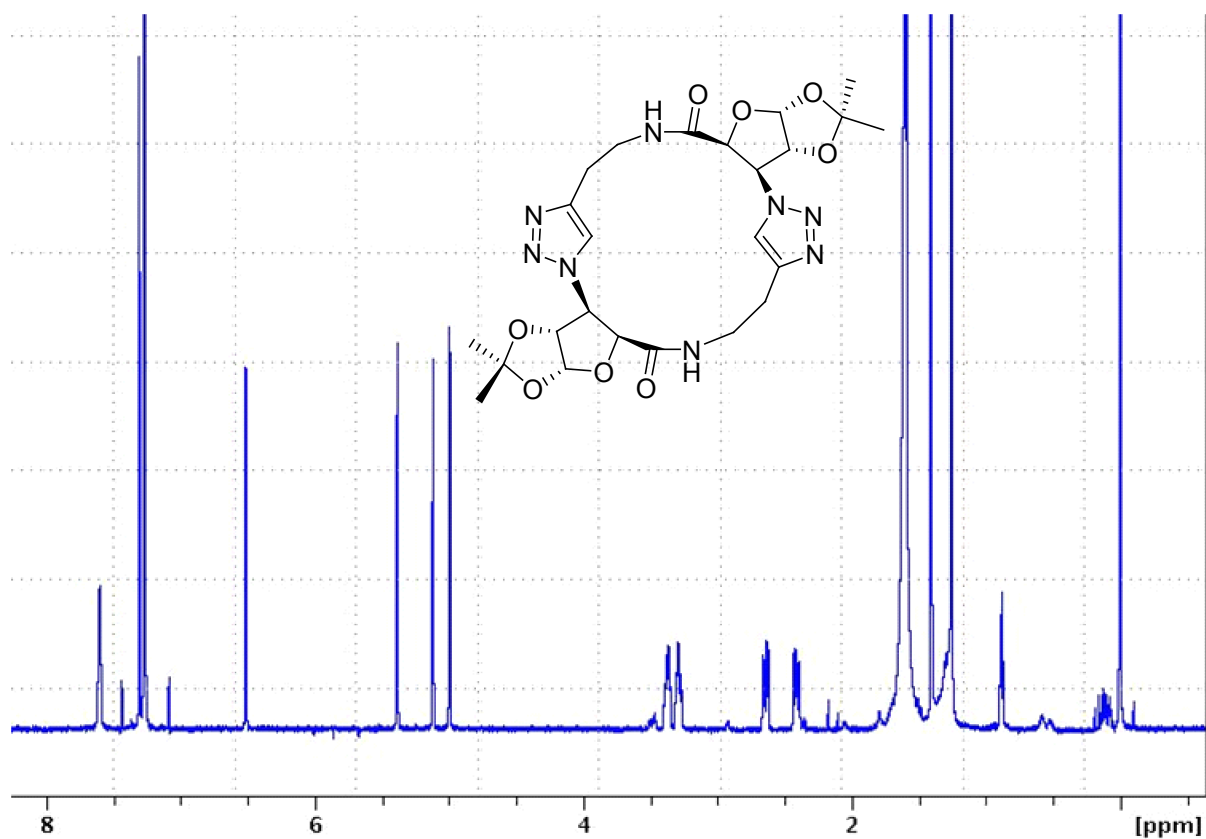

**Fig.8:** <sup>1</sup>H NMR Spectrum of compound **2b** in CDCl<sub>3</sub> at 298 in 600 MHz

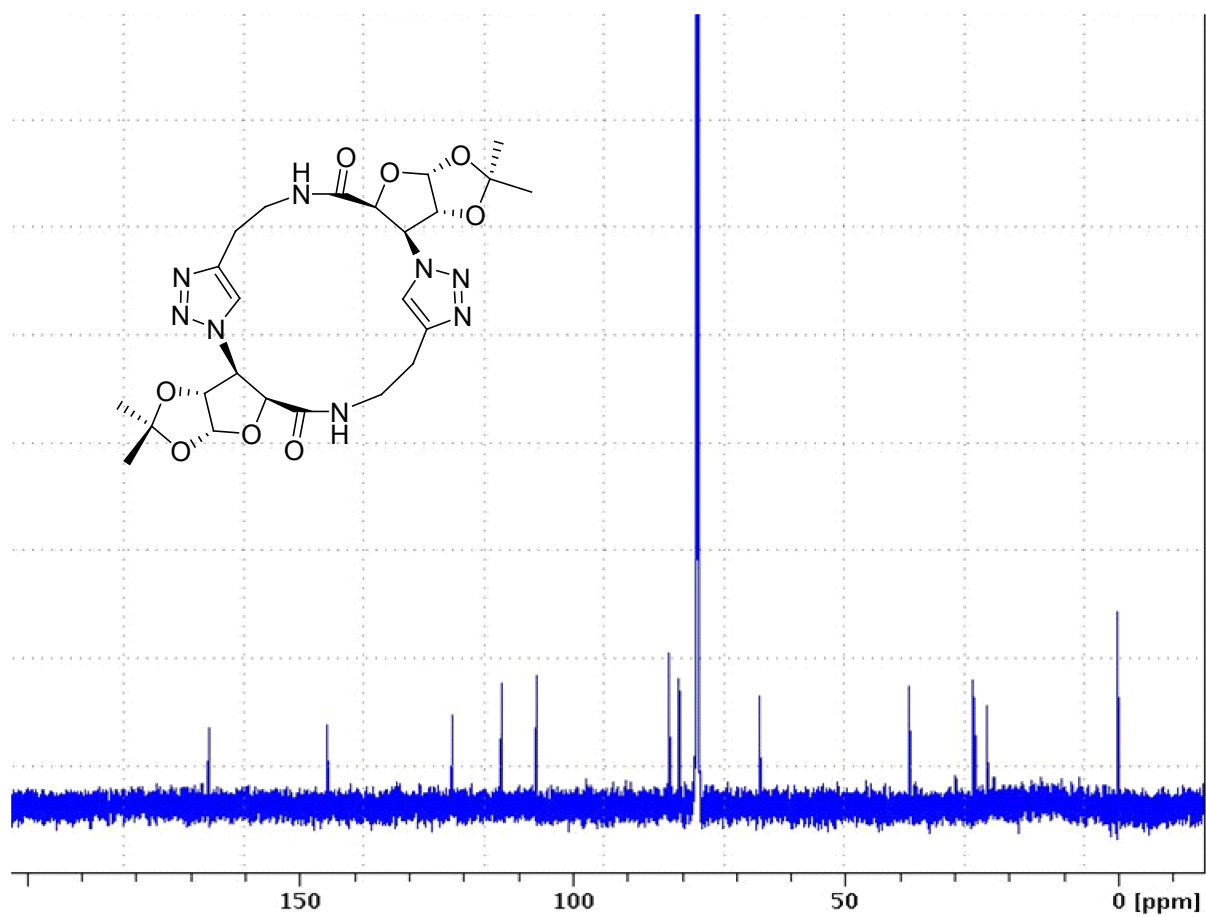

**Fig.9:**  $^{13}\text{C}$  NMR of compound **2b** in  $\text{CDCl}_3$  at 298K in 600MHz



### Concentration dependent NMR studies:

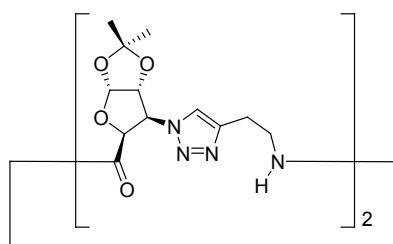

**Compound 2b**

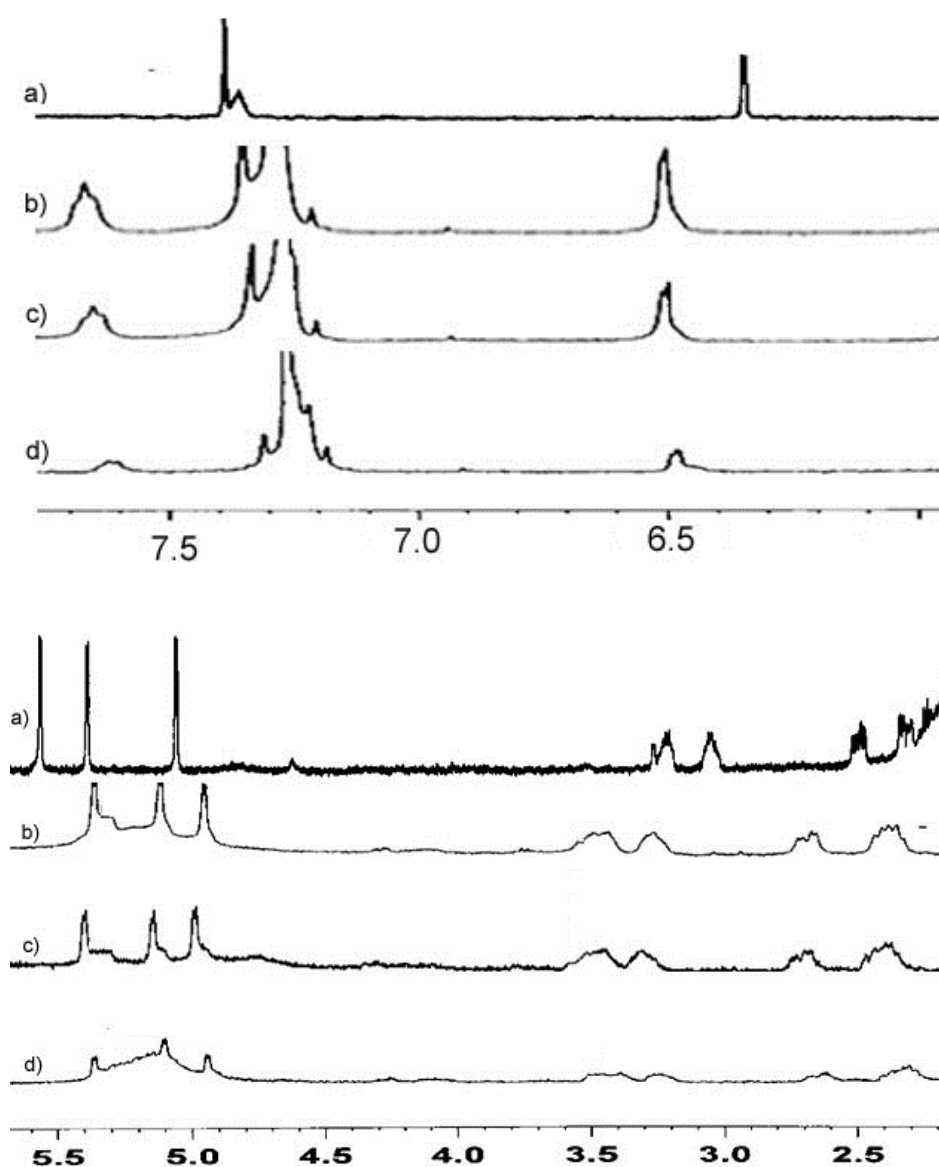

**Fig.10:** Selected Region of <sup>1</sup>H NMR Spectra of **2b**: a) 2 mM in CD<sub>3</sub>CN at 298K, b) 2 mM in (2:3) CDCl<sub>3</sub>:CCl<sub>4</sub>, c) 0.5 mM, and d) 0.125 mM in (2:3) CDCl<sub>3</sub>:CCl<sub>4</sub> at 243K.

### FT-IR Studies:

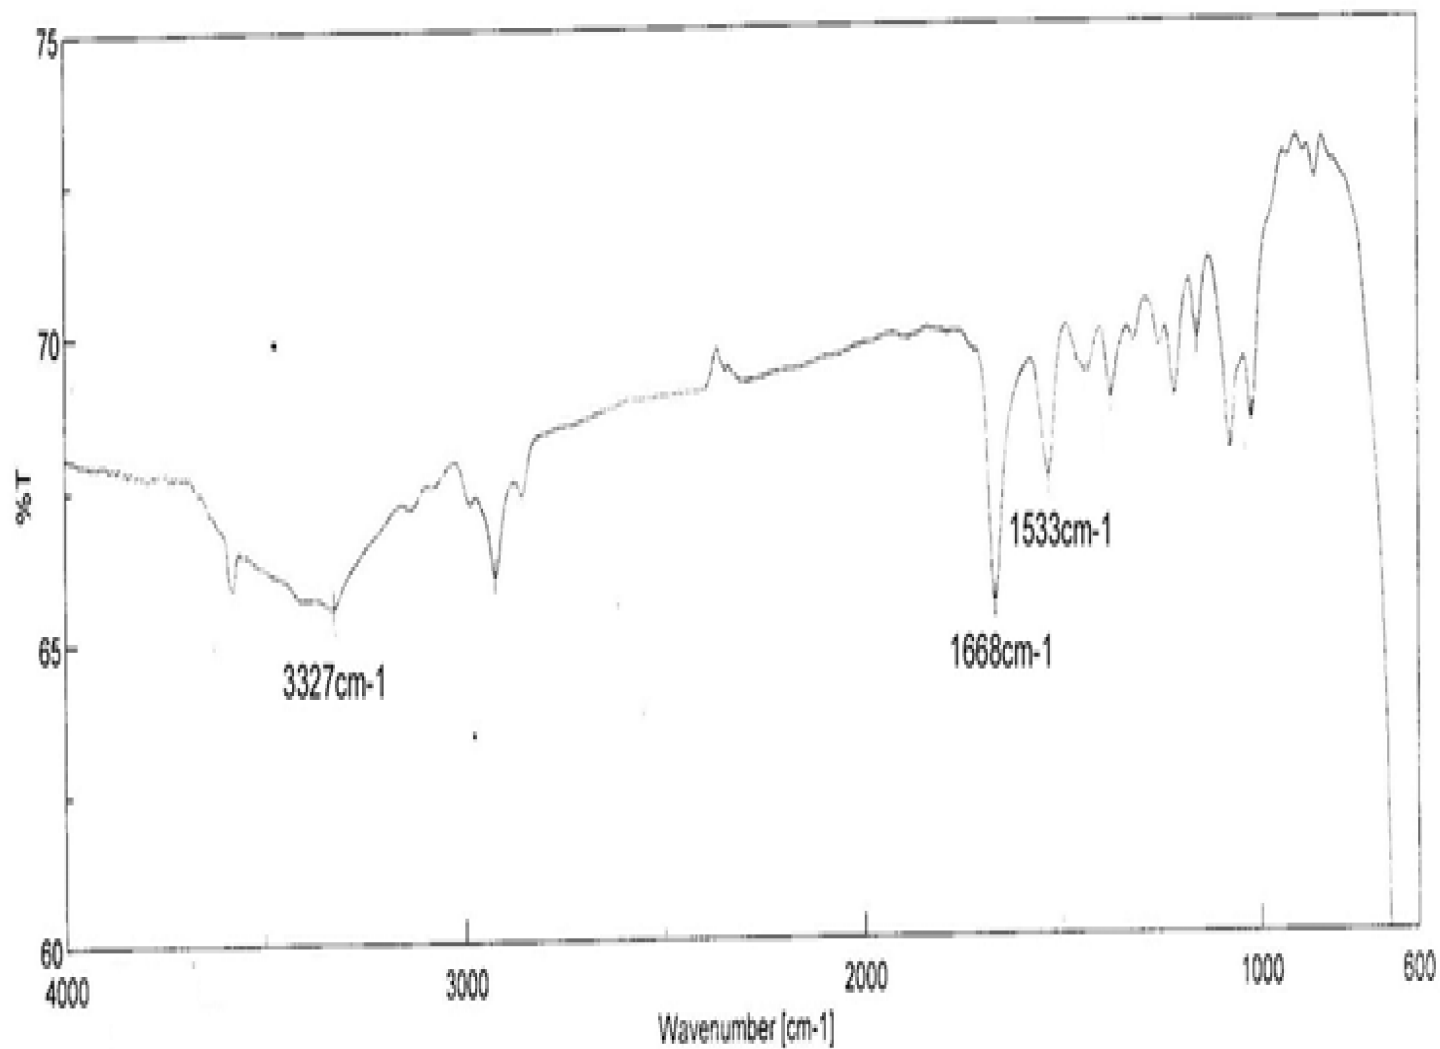

**Fig.11:** FT-IR Spectrum of 15 mM solution of compound **2b** in  $\text{CHCl}_3$

## 2D NMR of compound 2b:

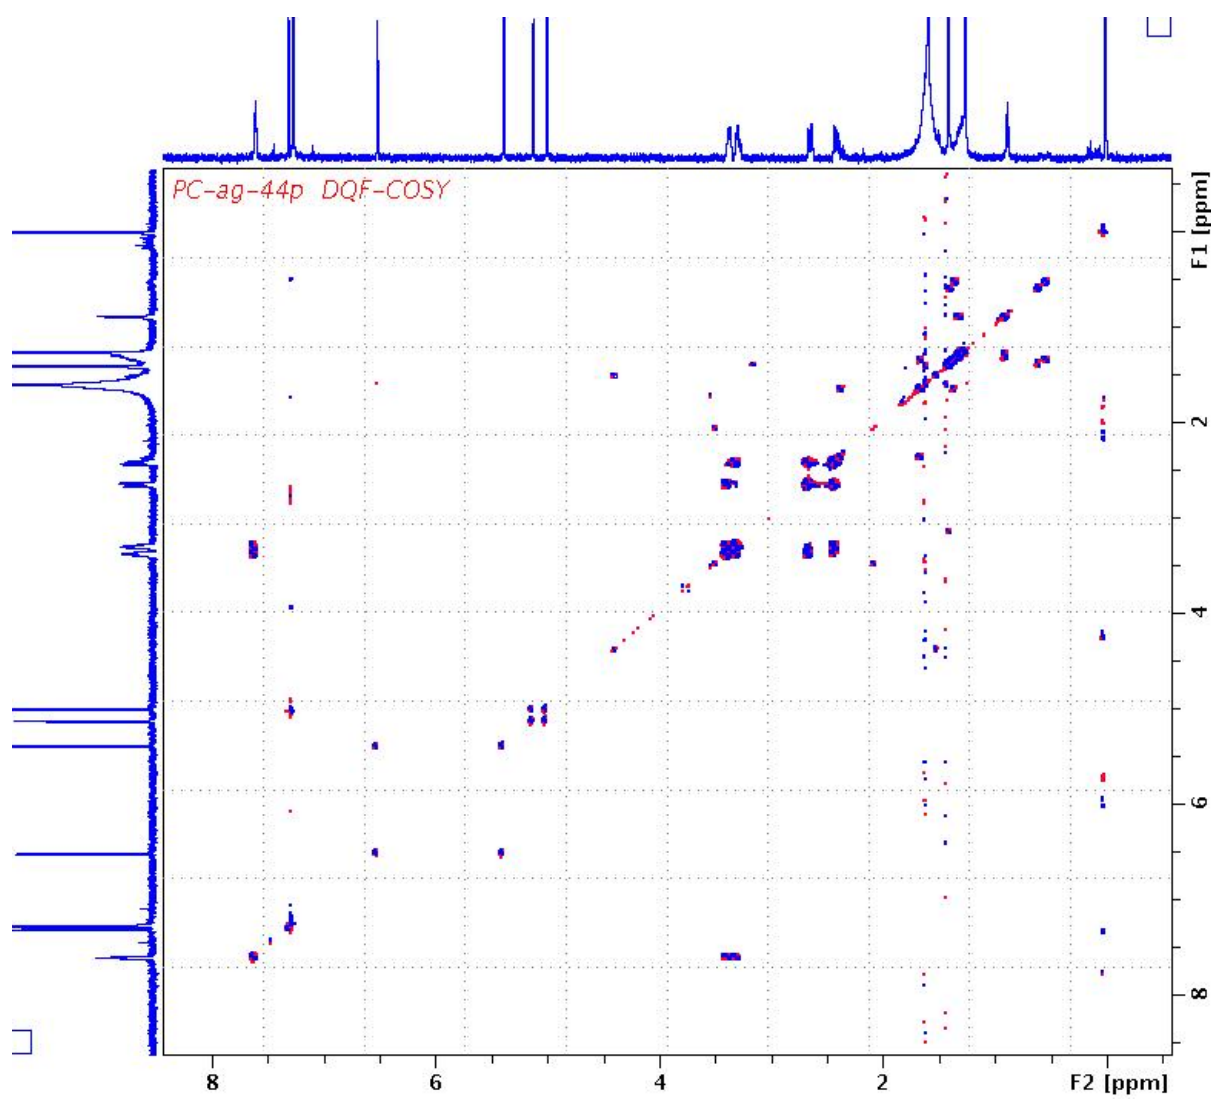

**Fig.12.**  $^1\text{H}$ - $^1\text{H}$  DQF-COSY of **2b** in  $\text{CDCl}_3$  at 300K in 600MHz

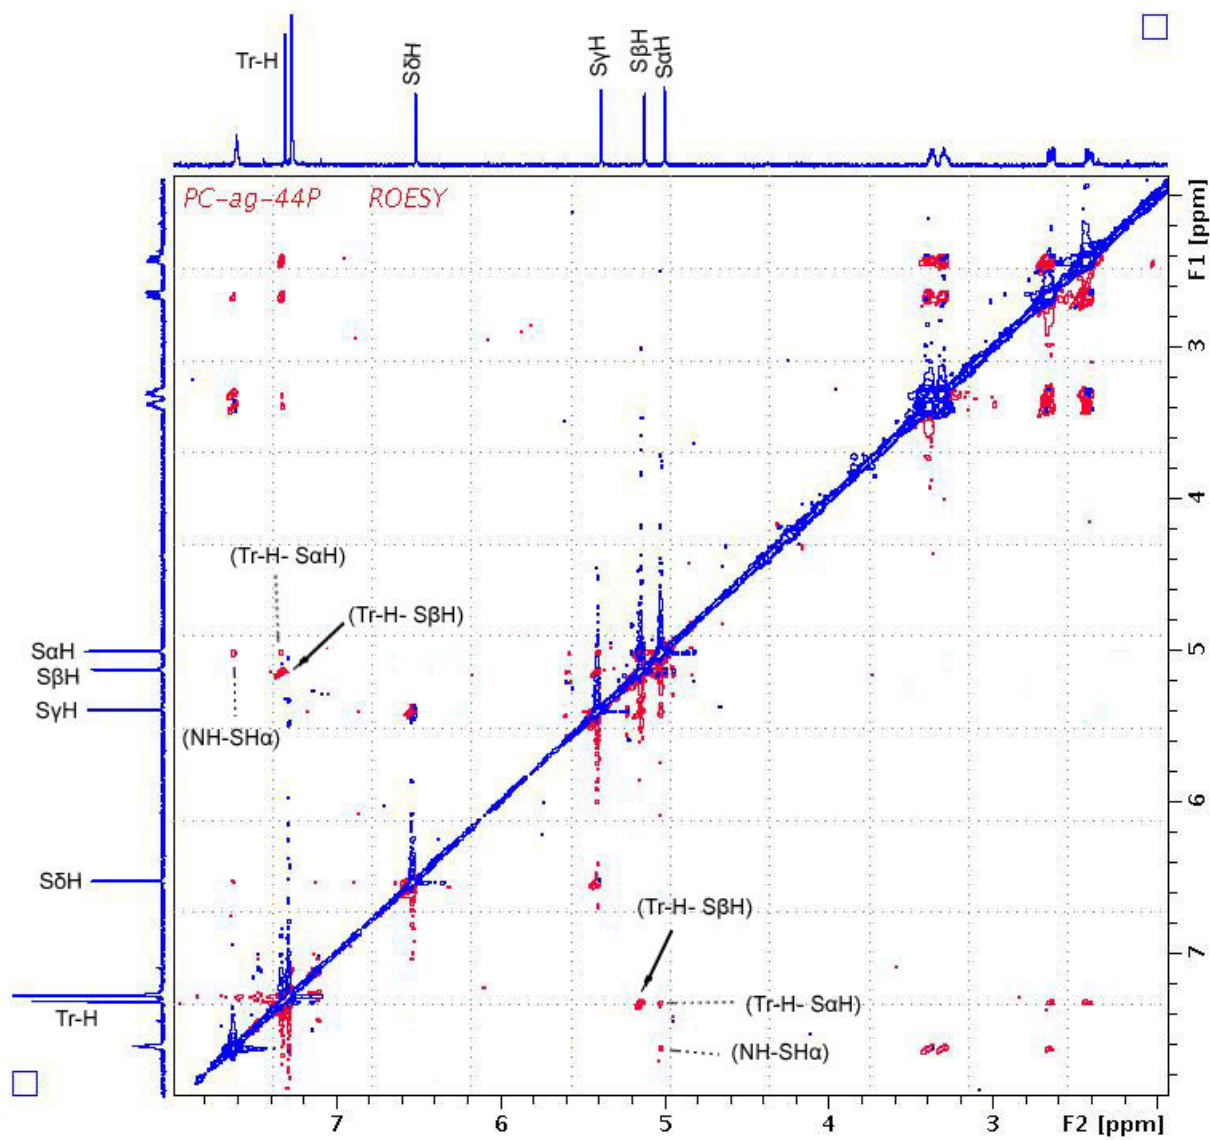

**Fig.13:**  $^1\text{H}$ - $^1\text{H}$  ROESY of **2b** in  $\text{CDCl}_3$  at 300K in 600MHz

### Structure Analysis by NMR spectroscopy:

NMR analysis of compound **2b** at 298K in CDCl<sub>3</sub> (600 MHz) indicates the ring conformation which resembles the D,L-homologous conformation of triazole/amide functional group. DQF COSY showing the coupling constants around 9 Hz and around 3Hz indicates the presence of gauche conformation in β-alanine moiety. Again the ROESY spectrum showed the cross-peaks between NH and Cα protons as weak whereas the cross-peak between triazole proton and Cβ-proton is very strong.

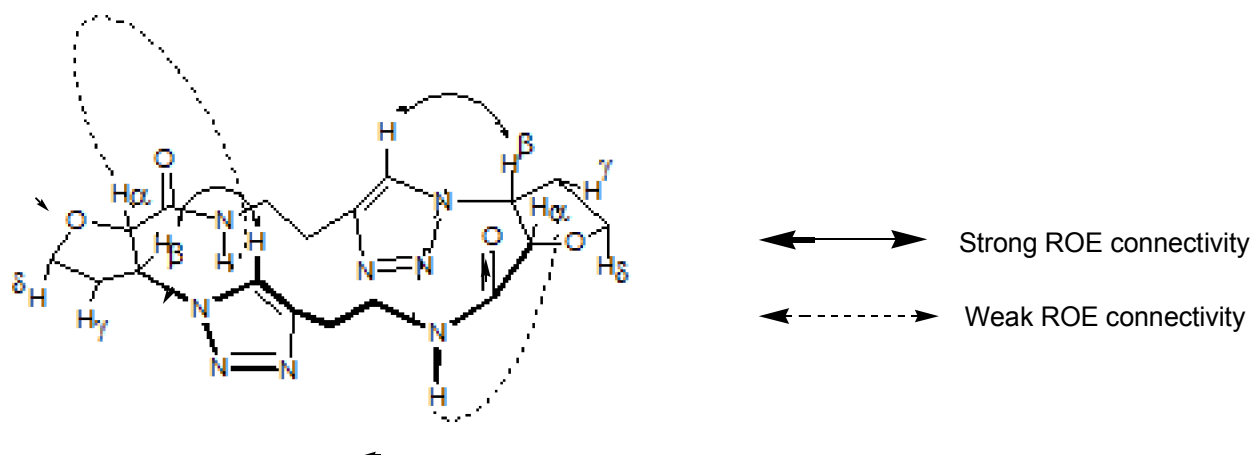

**Fig.14.** Summary of ROE connectivity observed in compound **2b** in CDCl<sub>3</sub> at 300K. The observed coupling constant and these ROE connectivities are used as conformational restraints in Molecular modeling studies in silicon graphics O<sub>2</sub> work station to achieve the minimized structure in chloroform.

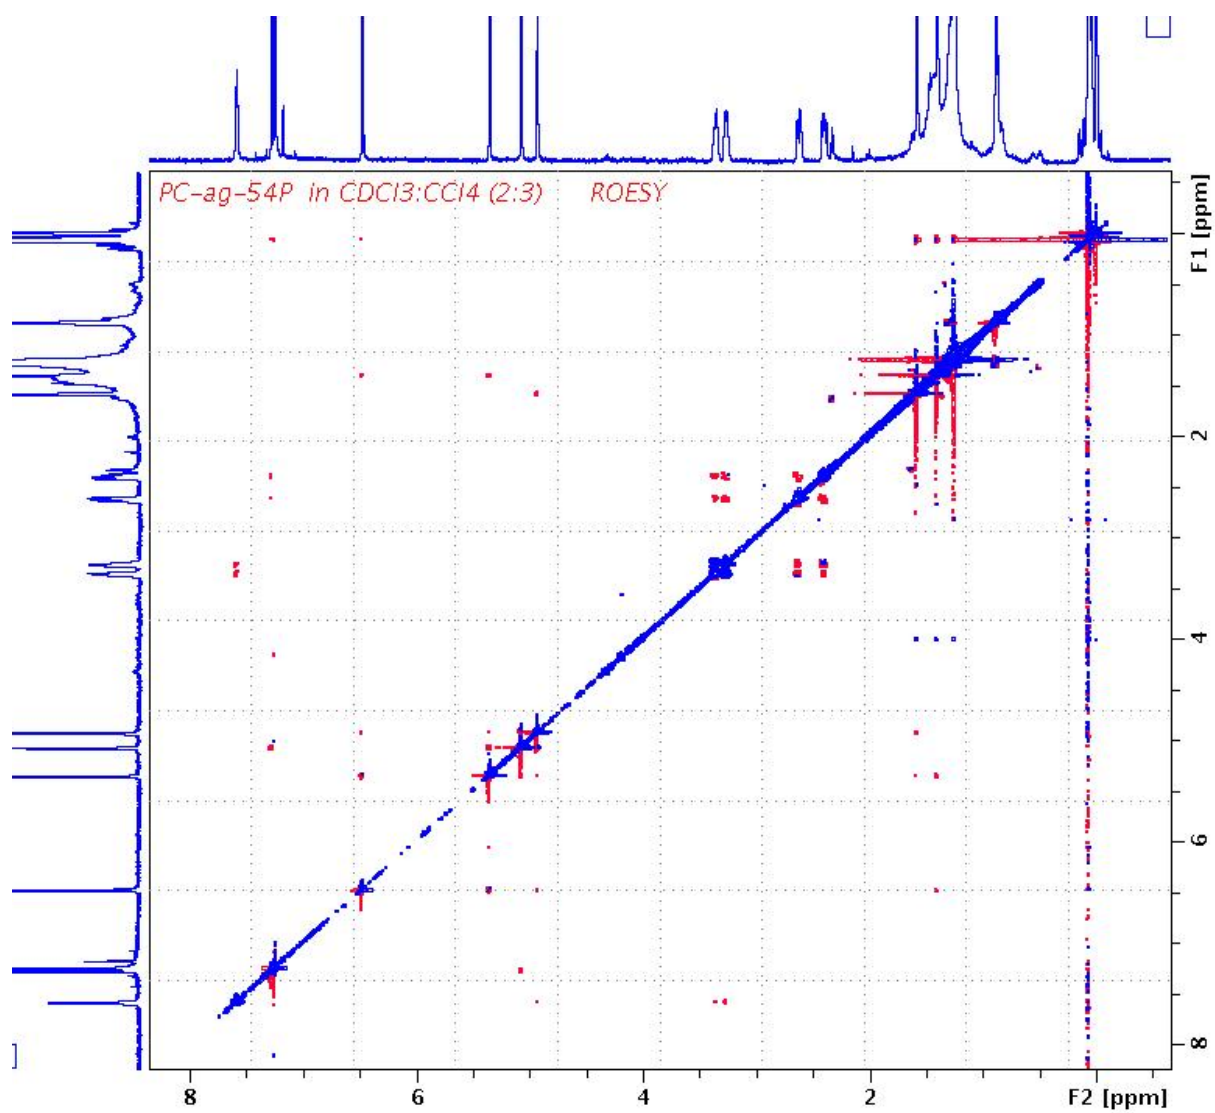

**Fig.15:** <sup>1</sup>H-<sup>1</sup>H ROESY of **2b** in 2:3 (CDCl<sub>3</sub>:CCl<sub>4</sub>) at 300K in 600MHz

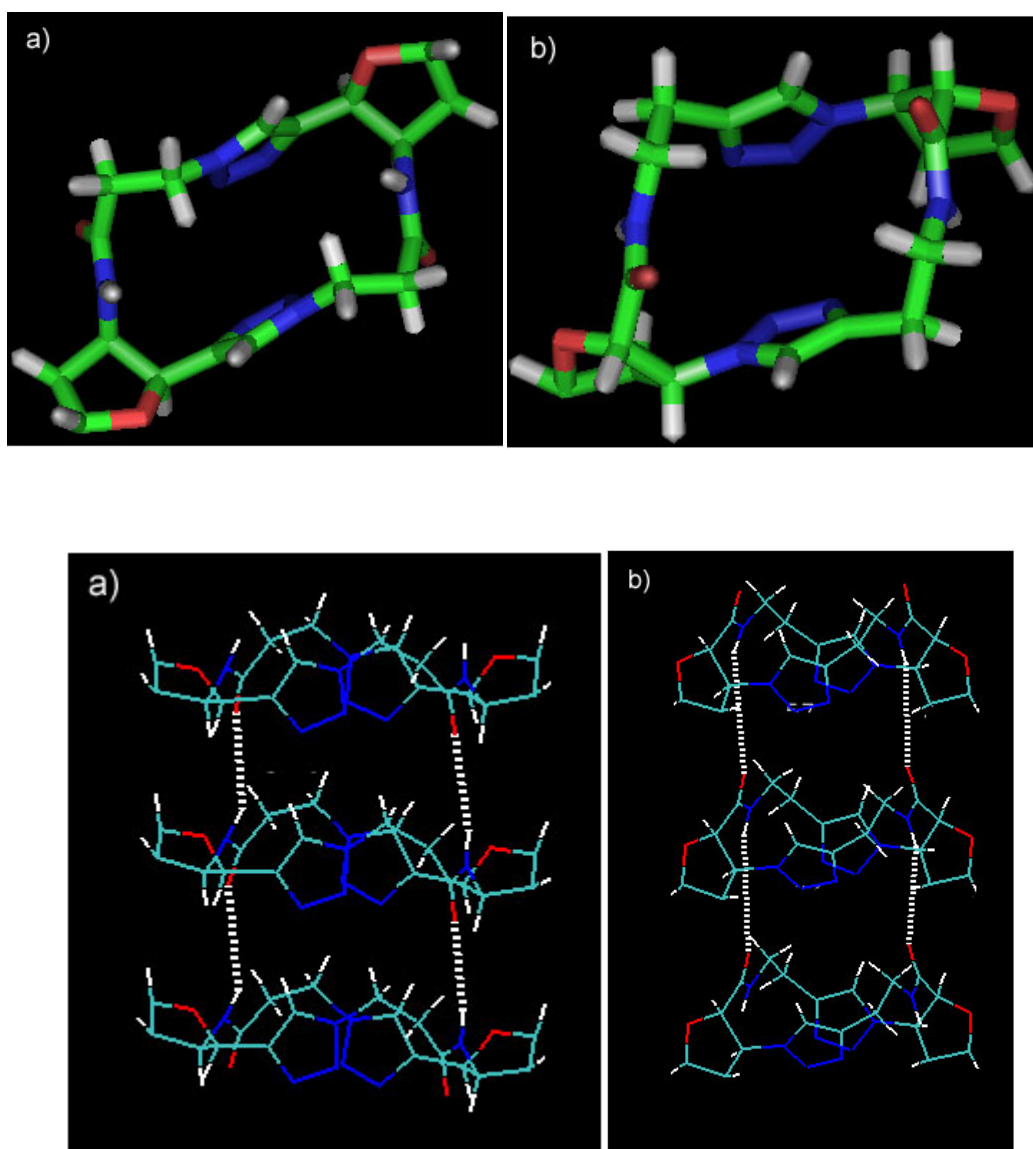

**Fig.16:** A typical schematic side view for self-assembly of compound a) for **2a** and b) for **2b** by molecular modeling without isopropylidene moiety for the sake of clarity.





|           |    |     |      |    |        |        |         |      |      |
|-----------|----|-----|------|----|--------|--------|---------|------|------|
| ATOM<br>C | 27 | C4  | PYRO | 1B | 7.367  | 4.471  | -3.798  | 1.00 | 0.00 |
| ATOM<br>N | 28 | N3  | PYRO | 1B | 8.568  | 3.965  | -3.510  | 1.00 | 0.00 |
| ATOM<br>O | 29 | O   | PYRO | 1B | 6.421  | 4.436  | -3.014  | 1.00 | 0.00 |
| ATOM<br>H | 30 | HC  | PYRO | 1B | 6.404  | 3.105  | -8.962  | 1.00 | 0.00 |
| ATOM<br>H | 31 | 1H2 | PYRO | 1B | 8.457  | 3.741  | -6.351  | 1.00 | 0.00 |
| ATOM<br>H | 32 | 2H2 | PYRO | 1B | 7.605  | 4.937  | -7.303  | 1.00 | 0.00 |
| ATOM<br>H | 33 | 1H3 | PYRO | 1B | 7.869  | 6.019  | -5.195  | 1.00 | 0.00 |
| ATOM<br>H | 34 | 2H3 | PYRO | 1B | 6.188  | 5.549  | -5.239  | 1.00 | 0.00 |
| ATOM<br>H | 35 | H3  | PYRO | 1B | 9.361  | 4.193  | -4.126  | 1.00 | 0.00 |
| ATOM<br>C | 36 | C1  | CPEN | 1C | 9.758  | 3.763  | -1.330  | 1.00 | 0.00 |
| ATOM<br>C | 37 | C2  | CPEN | 1C | 11.154 | 3.293  | -1.730  | 1.00 | 0.00 |
| ATOM<br>O | 38 | O3  | CPEN | 1C | 10.999 | 2.180  | -2.635  | 1.00 | 0.00 |
| ATOM<br>C | 39 | C13 | CPEN | 1C | 8.807  | 3.080  | -2.328  | 1.00 | 0.00 |
| ATOM<br>C | 40 | C33 | CPEN | 1C | 9.607  | 1.789  | -2.657  | 1.00 | 0.00 |
| ATOM<br>H | 41 | H1  | CPEN | 1C | 9.672  | 4.866  | -1.329  | 1.00 | 0.00 |
| ATOM<br>H | 42 | H2  | CPEN | 1C | 11.734 | 4.100  | -2.216  | 1.00 | 0.00 |
| ATOM<br>H | 43 | H13 | CPEN | 1C | 7.856  | 2.808  | -1.823  | 1.00 | 0.00 |
| ATOM<br>H | 44 | H33 | CPEN | 1C | 9.456  | 1.087  | -1.812  | 1.00 | 0.00 |
| ATOM<br>N | 45 | N1  | PYRO | 1D | 8.043  | 0.273  | -4.051  | 1.00 | 0.00 |
| ATOM<br>N | 46 | N2  | PYRO | 1D | 7.970  | -0.130 | -5.336  | 1.00 | 0.00 |
| ATOM<br>N | 47 | N3  | PYRO | 1D | 9.055  | 0.293  | -6.032  | 1.00 | 0.00 |
| ATOM<br>C | 48 | C4  | PYRO | 1D | 9.833  | 1.007  | -5.142  | 1.00 | 0.00 |
| ATOM<br>C | 49 | C5  | PYRO | 1D | 9.201  | 1.005  | -3.916  | 1.00 | 0.00 |
| ATOM<br>H | 50 | H4  | PYRO | 1D | 10.750 | 1.527  | -5.375  | 1.00 | 0.00 |
| ATOM<br>O | 51 | O   | CPEN | 1E | 3.131  | 0.297  | -11.763 | 1.00 | 0.00 |
| ATOM<br>C | 52 | C   | CPEN | 1E | 2.401  | -0.833 | -11.276 | 1.00 | 0.00 |
| ATOM<br>C | 53 | C1  | CPEN | 1E | 2.084  | -1.771 | -12.440 | 1.00 | 0.00 |
| ATOM<br>C | 54 | C2  | CPEN | 1E | 1.124  | -0.348 | -10.597 | 1.00 | 0.00 |





|           |    |     |      |    |        |        |         |      |      |
|-----------|----|-----|------|----|--------|--------|---------|------|------|
| ATOM<br>N | 27 | N3  | PYRO | 1B | 3.861  | -1.010 | -2.676  | 1.00 | 0.00 |
| ATOM<br>C | 28 | C4  | PYRO | 1B | 3.895  | -2.351 | -2.671  | 1.00 | 0.00 |
| ATOM<br>O | 29 | O   | PYRO | 1B | 4.874  | -2.999 | -3.051  | 1.00 | 0.00 |
| ATOM<br>H | 30 | HC  | PYRO | 1B | 5.133  | 1.846  | -6.157  | 1.00 | 0.00 |
| ATOM<br>H | 31 | 1H2 | PYRO | 1B | 5.542  | 1.887  | -3.417  | 1.00 | 0.00 |
| ATOM<br>H | 32 | 2H2 | PYRO | 1B | 4.149  | 1.678  | -2.382  | 1.00 | 0.00 |
| ATOM<br>H | 33 | 1H3 | PYRO | 1B | 5.821  | -0.269 | -2.411  | 1.00 | 0.00 |
| ATOM<br>H | 34 | 2H3 | PYRO | 1B | 5.405  | -0.585 | -4.096  | 1.00 | 0.00 |
| ATOM<br>H | 35 | H3  | PYRO | 1B | 3.011  | -0.535 | -2.340  | 1.00 | 0.00 |
| ATOM<br>C | 36 | C1  | CPEN | 1C | 1.354  | -3.178 | -3.070  | 1.00 | 0.00 |
| ATOM<br>C | 37 | C2  | CPEN | 1C | 2.624  | -3.100 | -2.178  | 1.00 | 0.00 |
| ATOM<br>O | 38 | O3  | CPEN | 1C | 2.135  | -2.531 | -0.936  | 1.00 | 0.00 |
| ATOM<br>C | 39 | C13 | CPEN | 1C | 0.445  | -2.317 | -2.183  | 1.00 | 0.00 |
| ATOM<br>C | 40 | C33 | CPEN | 1C | 0.731  | -2.821 | -0.754  | 1.00 | 0.00 |
| ATOM<br>H | 41 | H1  | CPEN | 1C | 0.972  | -4.217 | -3.054  | 1.00 | 0.00 |
| ATOM<br>H | 42 | H2  | CPEN | 1C | 2.942  | -4.140 | -1.966  | 1.00 | 0.00 |
| ATOM<br>H | 43 | H13 | CPEN | 1C | 0.683  | -1.234 | -2.311  | 1.00 | 0.00 |
| ATOM<br>H | 44 | H33 | CPEN | 1C | 1.062  | -2.407 | 0.216   | 1.00 | 0.00 |
| ATOM<br>N | 45 | N1  | PYRO | 1D | 1.496  | -2.751 | -4.516  | 1.00 | 0.00 |
| ATOM<br>C | 46 | C2  | PYRO | 1D | 2.201  | -3.337 | -5.542  | 1.00 | 0.00 |
| ATOM<br>C | 47 | C3  | PYRO | 1D | 1.990  | -2.618 | -6.646  | 1.00 | 0.00 |
| ATOM<br>N | 48 | N4  | PYRO | 1D | 1.208  | -1.654 | -6.400  | 1.00 | 0.00 |
| ATOM<br>N | 49 | N5  | PYRO | 1D | 0.875  | -1.696 | -5.092  | 1.00 | 0.00 |
| ATOM<br>H | 50 | H2  | PYRO | 1D | 2.816  | -4.222 | -5.459  | 1.00 | 0.00 |
| ATOM<br>O | 51 | O   | CPEN | 1E | 0.570  | 3.132  | -8.605  | 1.00 | 0.00 |
| ATOM<br>C | 52 | C   | CPEN | 1E | 0.467  | 3.799  | -9.879  | 1.00 | 0.00 |
| ATOM<br>C | 53 | C1  | CPEN | 1E | 0.863  | 5.274  | -9.712  | 1.00 | 0.00 |
| ATOM<br>C | 54 | C2  | CPEN | 1E | -0.970 | 3.666  | -10.411 | 1.00 | 0.00 |
